# Supplementary material for: Involvement of Pore Formation and Osmotic Lysis in the Rapid Killing of Gamma Interferon-Pretreated C166 Endothelial Cells by Rickettsia prowazekii
Source: MDPI journal article supplement (doi:10.3390/tropicalmed7080163), 2022-08-01

Figure S1, Results of ethidium bromide staining in experiment 77

Exp 77 - Mock-infected

Transmitted Light (A)

Fluorescence (B)

Fluorescence\* (C)

Overlay (D)

1

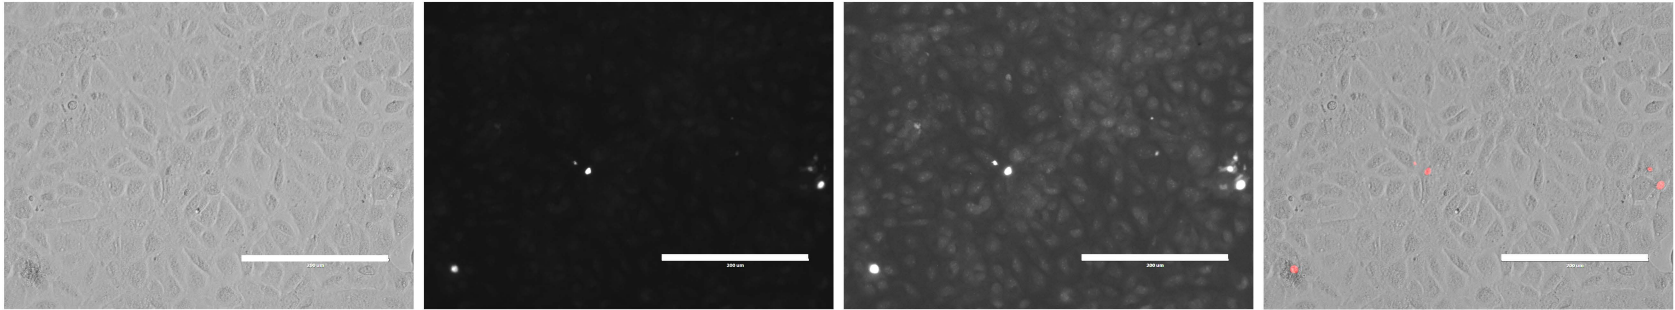

2

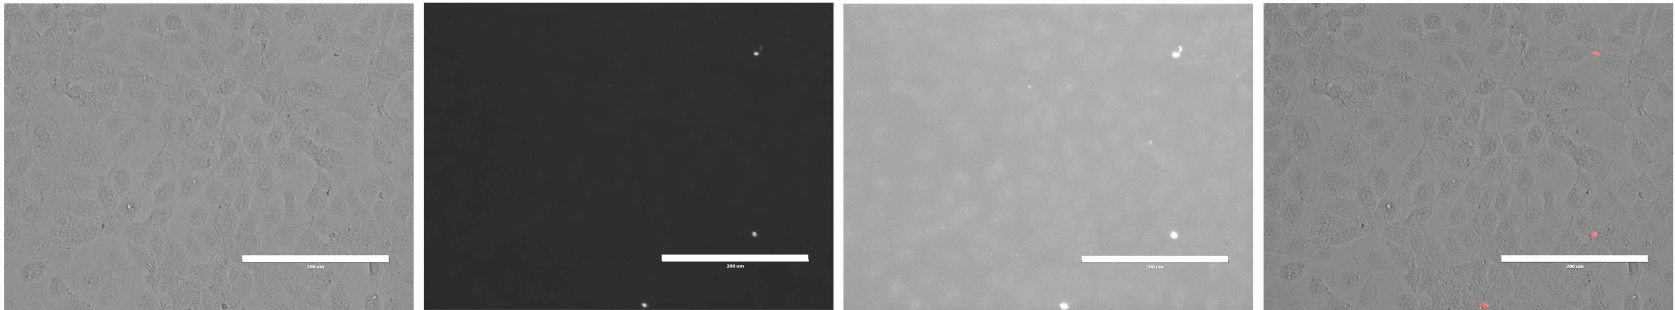

3

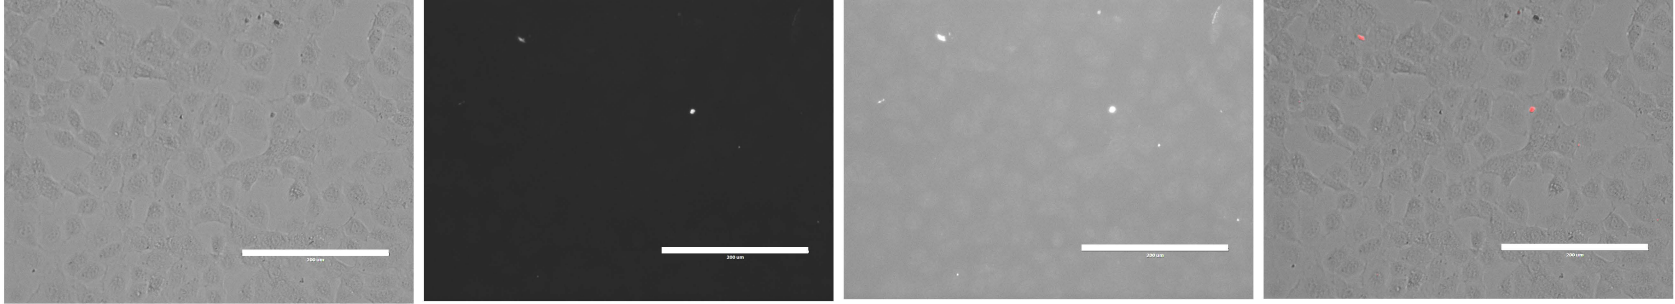

4

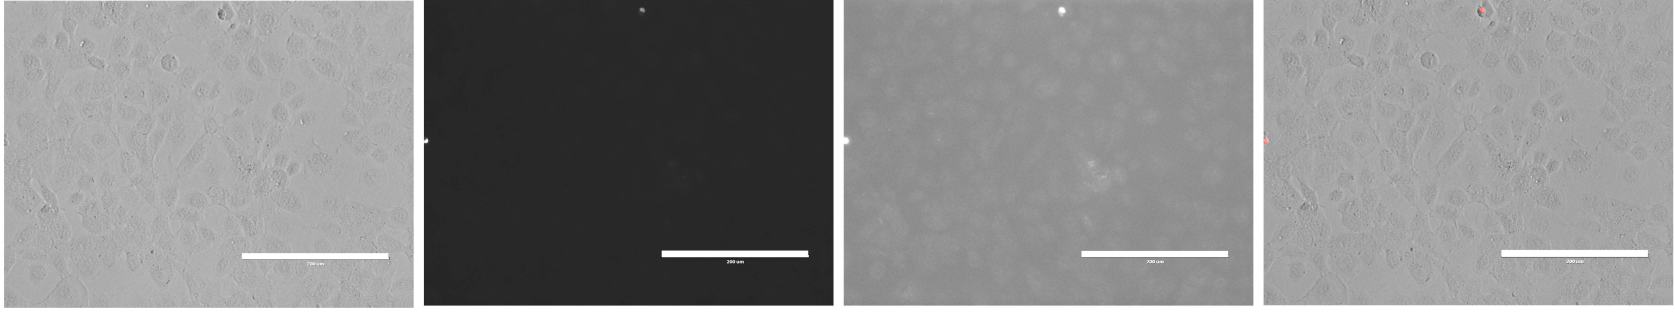

5

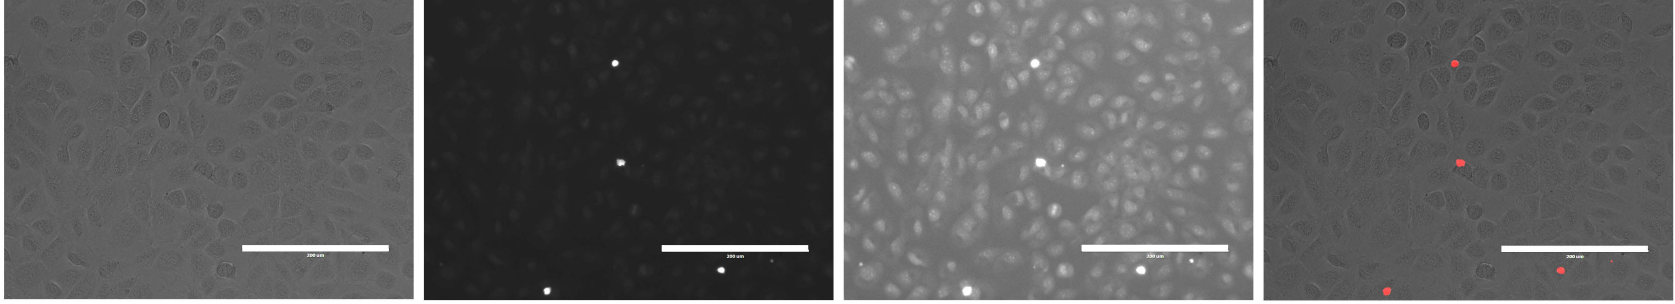

6

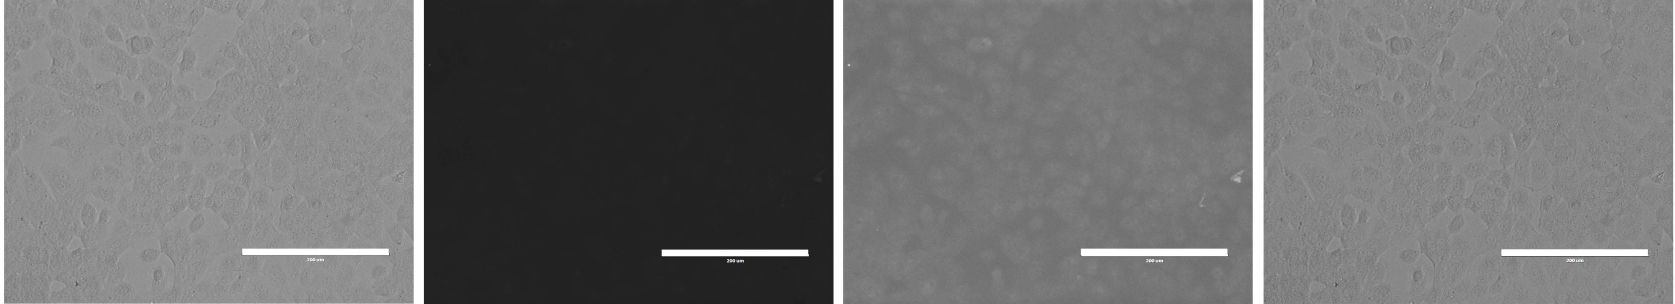

7

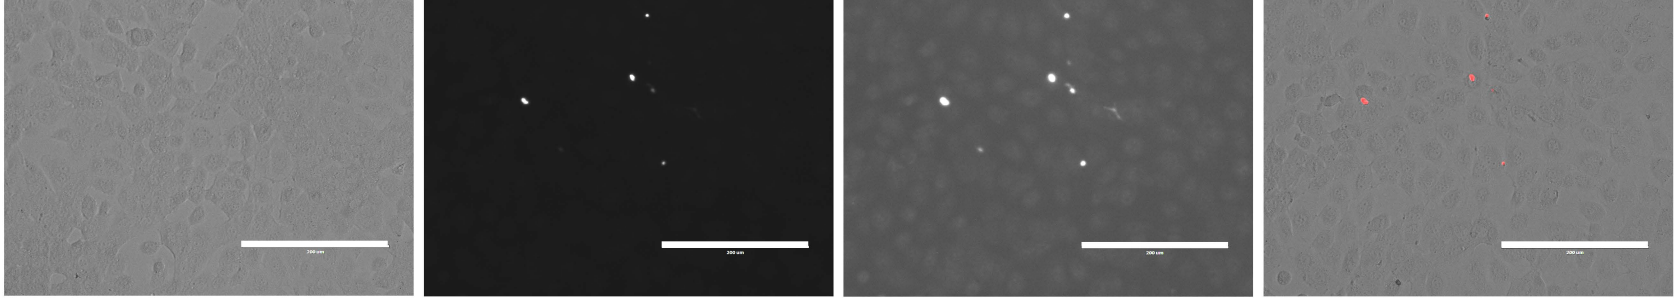

8

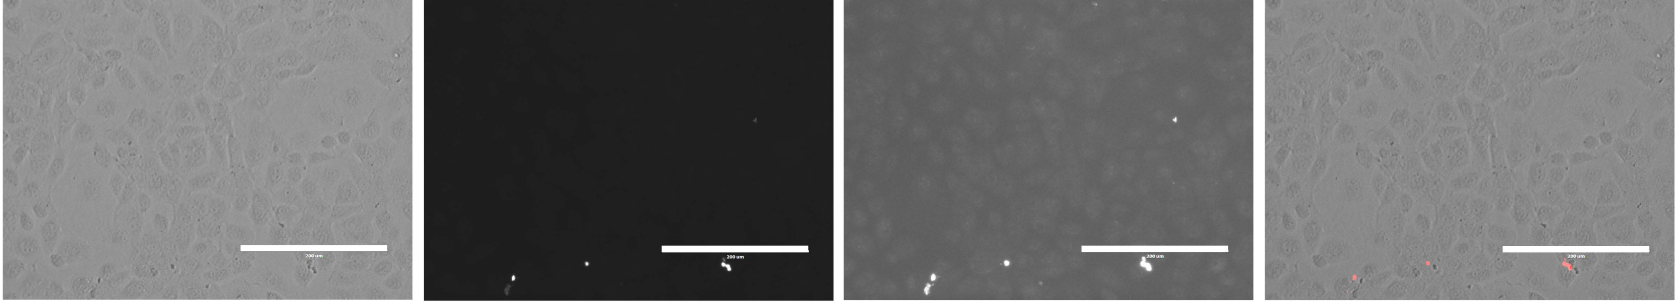

9

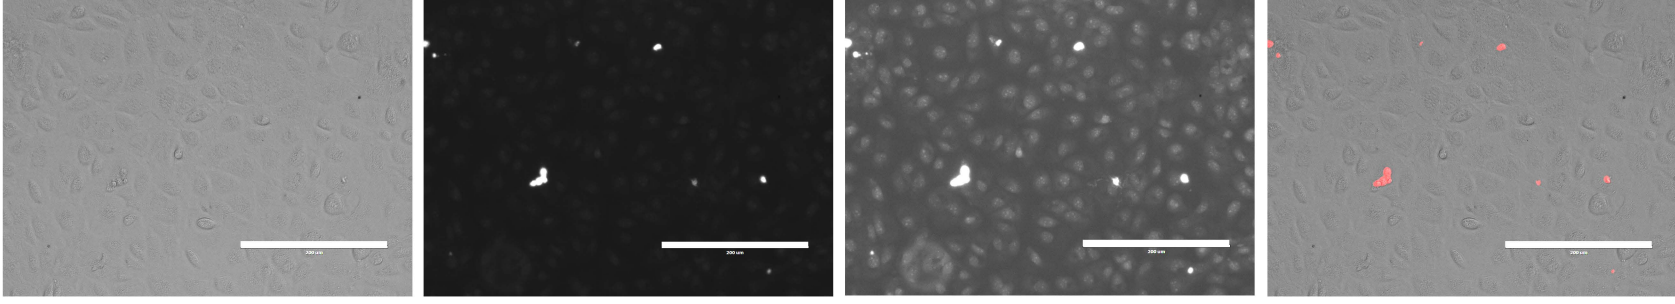

10

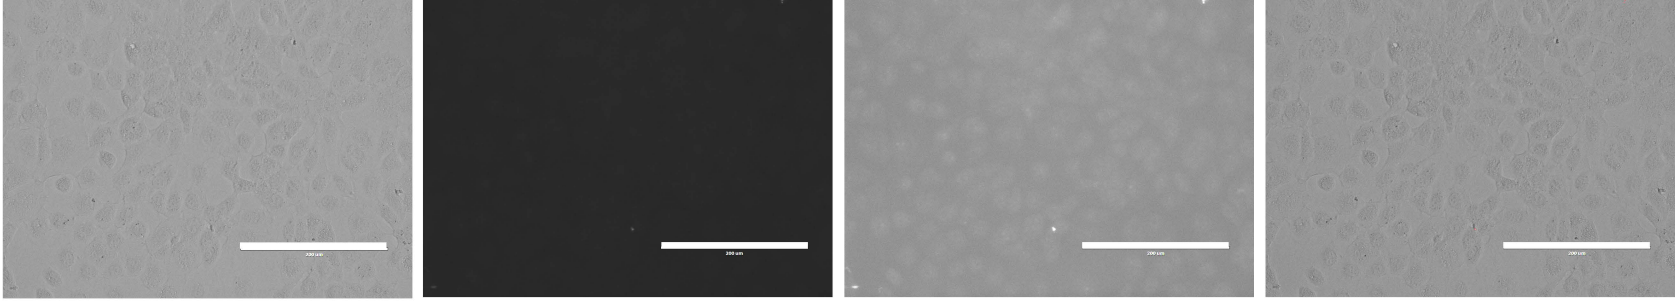

11

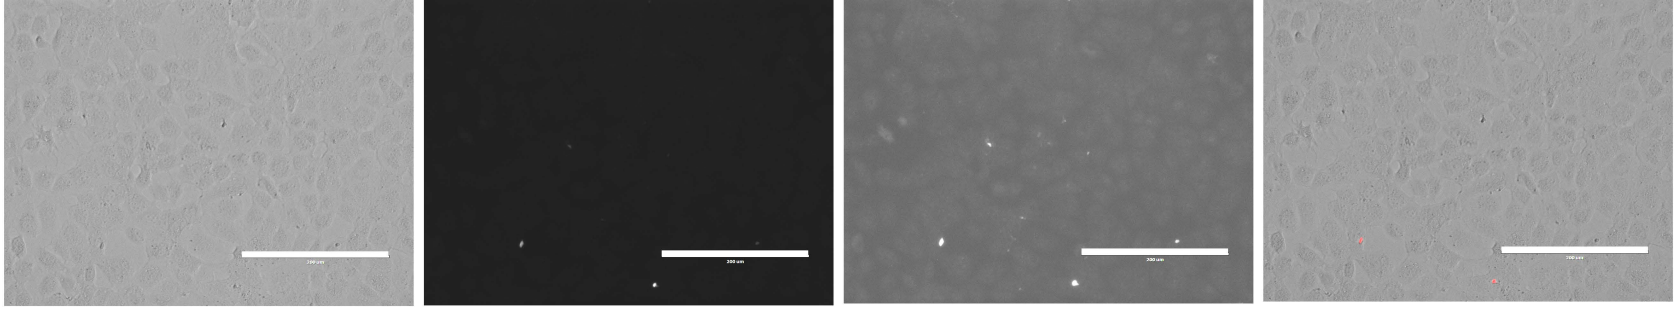

12

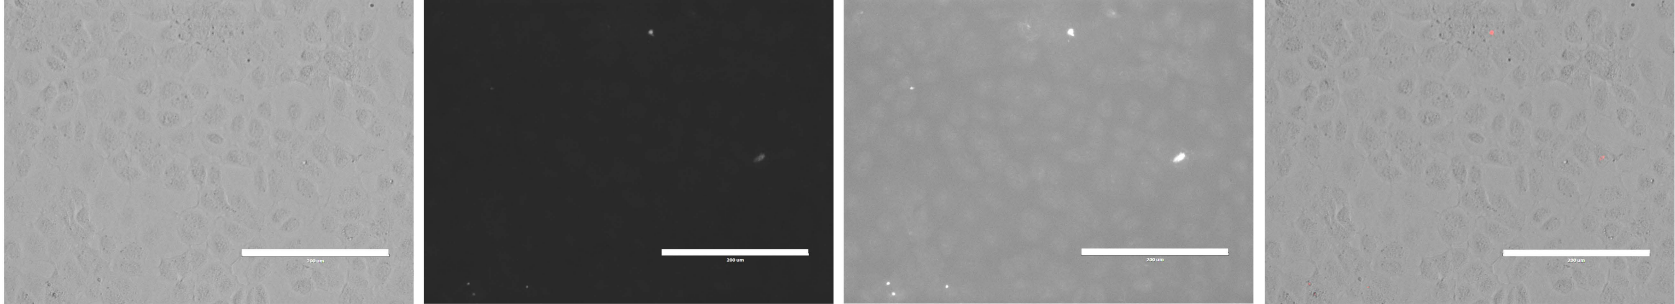

13

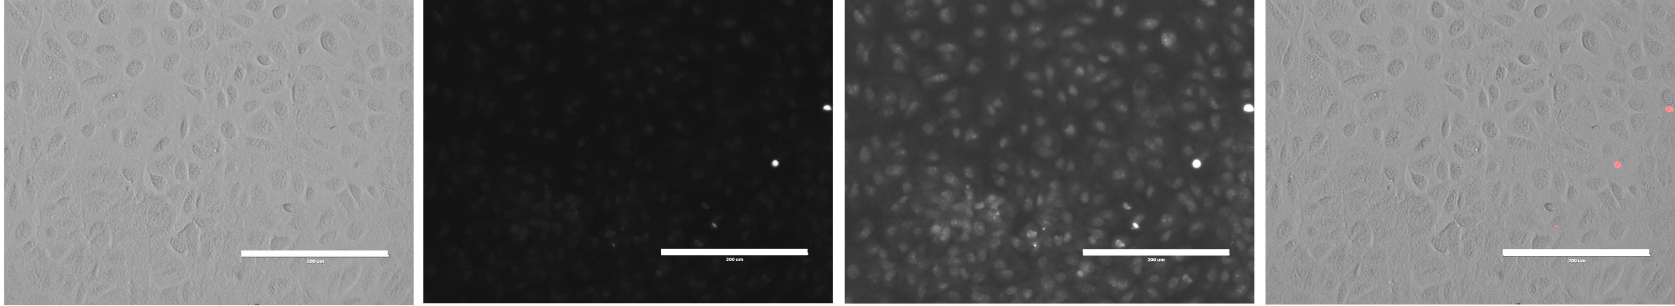

14

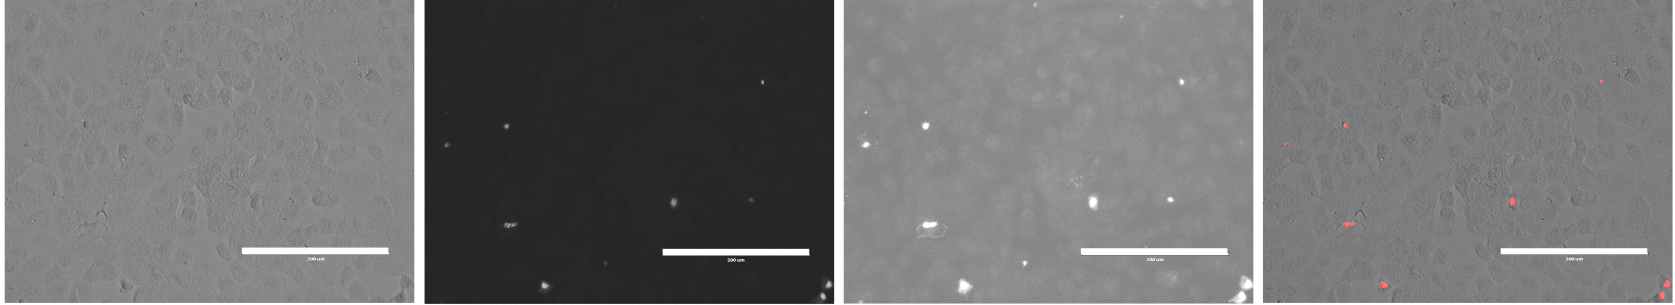

15

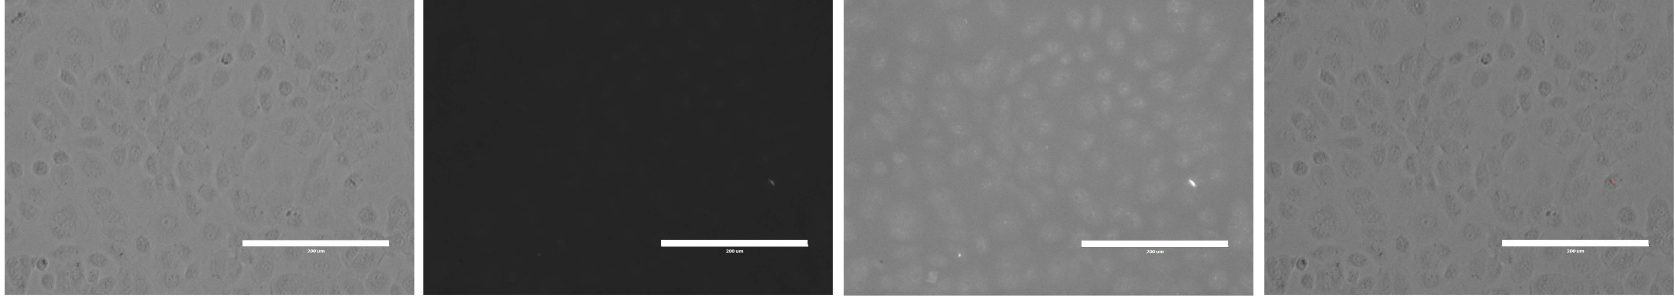

16

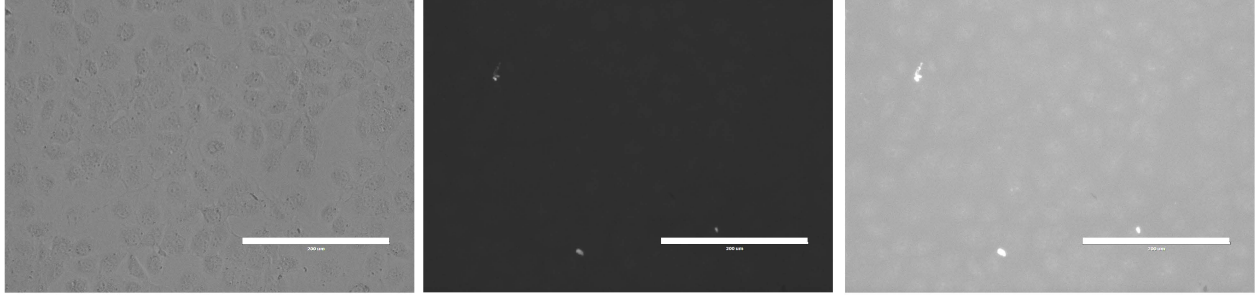

Supplement: s1 [file s1]
