# Supplementary material for: Involvement of Pore Formation and Osmotic Lysis in the Rapid Killing of Gamma Interferon-Pretreated C166 Endothelial Cells by Rickettsia prowazekii
Source: MDPI journal article supplement (doi:10.3390/tropicalmed7080163), 2022-08-01
Supplement: s1 [file s1]

|                                                                                                                                                           |  |                                                                                              |  |
|-----------------------------------------------------------------------------------------------------------------------------------------------------------|--|----------------------------------------------------------------------------------------------|--|
| TABLE S4, SHEET 1 (pages 1-14) -- PERCENTAGE OF TOTAL LDH RELEASED                                                                                        |  | ABBREVIATIONS USED IN THIS TABLE ARE DEFINED ON PAGE 14                                      |  |
| LDH Release Data for Fig 3, Table 1, & Table S6                                                                                                           |  | TREATMENTS IN SHEET 1 (pages 1-14) ARE SHOWN BELOW IN DARK BLUE, BOLD-FACE TYPE              |  |
| The purpose of this table (Table S4) is to provide the individual values for the data (means and standard deviations) shown in Fig 3, Table 1, & Table S6 |  |                                                                                              |  |
| In this table (Table S4) each mean and standard deviation is shown below the corresponding individual values.                                             |  |                                                                                              |  |
| Some data shown here are summarized in Figure 3, Table 1 & Table S6.                                                                                      |  |                                                                                              |  |
| Data (means & standard deviations) used in Figure 3 are highlighted in pink below.                                                                        |  | Sheet 2 gives an additional summary of some of the means & standard deviations in this table |  |

The numbers 1, 2, 3, & 4 indicate the hours after addition of the rickettsiae or mock-infection.

|                |         | 1    | 2    | 3    | 4    |          |              | 1    | 2    | 3    | 4    |
|----------------|---------|------|------|------|------|----------|--------------|------|------|------|------|
| black=69       | Mk Ctrl | 0.03 | 1.07 | 1.32 | 1.28 | Mk Ctrl  | Peg 4000 d/a | 0.23 | 0.79 | 1.52 | 0.61 |
| red=70         |         | 0.00 | 0.6  | 0.85 | 0.84 |          |              | 0    | 1.12 | 0.49 | 0.88 |
| green=71       |         | 0.2  | 0.5  | 0.2  | 0.7  |          |              | 0.4  | 1.9  | 1.1  | 1.1  |
| black=68       |         | 0    | 0.1  | 0    | 0.3  |          |              | 1.1  | 1.2  | 0.5  | 1.1  |
| red=72         |         | 0.4  | 0    | 0    | 2.1  |          |              | 3.9  | 3.3  | 3.3  | 3.4  |
| green=74       |         | 0.3  | 0    | 0    | 0    |          |              | 2.4  | 1.8  | 1.8  | 2    |
| black=75       |         | 0.00 |      | 2.3  | 0.6  |          |              |      |      |      | 0.5  |
| purple=80      |         | 0.00 |      | 0.1  | 0.7  |          |              |      |      |      | 0.3  |
| black=69 later |         | 0.5  |      | 0    | 0.5  |          |              |      |      |      |      |
|                |         | 0.3  |      | 0.1  | 0.8  |          |              |      |      |      |      |
|                |         |      |      | 0    | 0.5  |          |              |      |      |      |      |
|                |         |      |      | 0    | 0.6  |          |              |      |      |      |      |
|                |         |      |      | 0.3  | 0.4  |          |              |      |      |      |      |
|                |         |      |      | 0.2  | 0.7  |          |              |      |      |      |      |
|                |         |      |      | 0.5  | 0.2  |          |              |      |      |      |      |
|                |         |      |      | 0.2  |      |          |              |      |      |      |      |
| Mk Ctrl        | Mean    | 0.18 | 0.38 | 0.38 | 0.68 |          |              |      |      |      |      |
|                | Std Dev | 0.20 | 0.43 | 0.63 | 0.49 |          |              |      |      |      |      |
| RpL Ctrl       |         | 0    | 0.59 | 2.1  | 0.82 | RpL Ctrl | Peg 4000 d/a | 0    | 0.29 | 0.63 | 0.75 |
|                |         | 0    | 0.46 | 1.07 | 1.11 |          |              | 0    | 0.37 | 0.7  | 0.55 |
|                |         | 0.00 |      |      |      |          |              |      |      |      |      |
|                |         | 0.00 |      |      |      |          |              |      |      |      |      |
| RpL Ctrl       | Mean    | 0.00 | 0.53 | 1.59 | 0.97 |          |              | 0.0  | 0.3  | 0.7  | 0.7  |
|                | Std Dev | 0.00 | 0.09 | 0.73 | 0.21 |          |              | 0.0  | 0.1  | 0.0  | 0.1  |

|          |      |      |      |      |
|----------|------|------|------|------|
| RpM Ctrl | 0    | 0.67 | 2.97 | 1.07 |
|          | 0.08 | 0.59 | 1.19 | 0.79 |
|          | 0.3  | 0.3  | 0.3  | 1.1  |
|          | 0.4  | 1.1  | 0.2  | 0.9  |
|          | 0    | 1.1  | 1.2  | 0    |
|          | 0    | 0    | 0    | 0    |
|          | 0.00 |      | 0.5  | 0.8  |
|          | 0.00 |      | 0.4  | 1    |
|          | 0.9  |      | 0.6  | 1.1  |
|          | 0.4  |      | 0.4  | 1    |
|          | 0.9  |      | 0.1  | 1.1  |
|          |      |      | 0.2  | 0.5  |
|          |      |      | 0.1  | 0.4  |
|          |      |      | 0.3  |      |

|          |         |      |      |      |      |
|----------|---------|------|------|------|------|
| RpM Ctrl | Mean    | 0.28 | 0.63 | 0.57 | 0.75 |
|          | Std Dev | 0.36 | 0.44 | 0.73 | 0.40 |

|          |      |      |      |      |
|----------|------|------|------|------|
| RpH Ctrl | 0    | 0    | 1.17 | 1.35 |
|          | 0.07 | 0.42 | 1.42 | 1.52 |
|          | 0.35 |      |      | 1.4  |
|          | 0.00 |      |      | 1.3  |

|          |         |      |      |      |      |
|----------|---------|------|------|------|------|
| RpH Ctrl | Mean    | 0.11 | 0.21 | 1.30 | 1.39 |
|          | Std Dev | 0.17 | 0.30 | 0.18 | 0.09 |

|        |      |      |      |      |
|--------|------|------|------|------|
| Mk IFN | 0.05 | 1.88 | 2.22 | 1.92 |
|        | 0    | 0    | 1.04 | 0.82 |
|        | 0.4  | 0.4  | 0.9  | 1.8  |
|        | 0.1  | 0.4  | 0.2  | 0.3  |
|        | 0.4  | 0    | 0    | 0    |
|        | 1.6  | 0    | 1.1  | 0    |
|        | 0.00 |      | 0.7  | 0.9  |
|        | 0.00 |      | 0.5  | 1    |
|        | 0.4  |      | 0.6  | 0.6  |
|        | 1.0  |      | 0.5  | 0.3  |
|        |      |      | 0.3  | 0.6  |
|        |      |      | 0.9  | 0.6  |
|        |      |      | 0.1  | 0.9  |
|        |      |      | 0.1  | 0.4  |

|        |         |      |      |      |      |
|--------|---------|------|------|------|------|
| Mk IFN | Mean    | 0.40 | 0.45 | 0.59 | 0.72 |
|        | Std Dev | 0.53 | 0.73 | 0.57 | 0.55 |

|          |              |      |      |      |      |
|----------|--------------|------|------|------|------|
| RpM Ctrl | Peg 4000 d/a | 0    | 1.03 | 0.89 | 1.25 |
|          |              | 0.02 | 0.38 | 0.65 | 0.72 |
|          |              | 0.5  | 1.1  | 1.1  | 1.1  |
|          |              | 0.8  | 0.6  | 1.9  | 1.4  |
|          |              | 2.5  | 3.1  | 3.6  | 3.6  |

|         |     |     |     |     |
|---------|-----|-----|-----|-----|
| Mean    | 0.8 | 1.2 | 1.6 | 1.6 |
| Std Dev | 1.0 | 1.1 | 1.2 | 1.1 |

|          |              |   |      |      |      |
|----------|--------------|---|------|------|------|
| RpH Ctrl | Peg 4000 d/a | 0 | 0.48 | 0.7  | 0.78 |
|          |              | 0 | 0.39 | 0.61 | 0.67 |
|          |              |   |      |      | 0.9  |

|         |     |     |     |     |
|---------|-----|-----|-----|-----|
| Mean    | 0.0 | 0.4 | 0.7 | 0.9 |
| Std Dev | 0.0 | 0.1 | 0.1 | 0.3 |

|        |              |      |     |      |      |      |
|--------|--------------|------|-----|------|------|------|
| Mk IFN | Peg 4000 d/a | 0.11 | 0   | 2.51 | 2.95 | 2.95 |
|        |              | 0.02 | 0   | 3.07 |      | 8    |
|        |              | 1    | 3.1 | 5.1  | 8    | 7.7  |
|        |              | 1.5  | 3.1 | 5.4  | 7.7  | 5.6  |
|        |              | 0.4  | 3   | 4.1  | 5.6  | 5.5  |
|        |              | 4.3  | 3.6 | 4.2  | 5.5  | 1.9  |
|        |              |      |     |      | 1.9  | 2.2  |
|        |              |      |     |      | 2.2  |      |
|        |              |      |     |      |      |      |
|        |              |      |     |      |      |      |

|         |     |     |     |     |     |
|---------|-----|-----|-----|-----|-----|
| Mean    | 1.2 | 2.1 | 4.1 | 4.8 | 4.8 |
| Std Dev | 1.6 | 1.7 | 1.1 | 2.5 | 2.5 |

RpL IFN 1.57 27.4 37.84 43.07  
1.6 29.45 40.87 44.96  
**1.08**  
**2.04**

|         |         |      |       |       |       |
|---------|---------|------|-------|-------|-------|
| RpL IFN | Mean    | 1.57 | 28.43 | 39.36 | 44.02 |
|         | Std Dev | 0.39 | 1.45  | 2.14  | 1.34  |

RpM IFN 3.76 41.75 52.12 55.62  
2.81 43.3 54.58 58.46  
5 43.3 57.1 65.4  
3.9 47.5 63 74.3  
8.9 38.6 47.5 49.1  
9.5 36.9 43.8 46.1  
**2.26** 60.3 66.1  
**3.02** 58 61.4  
1.3 61.5 67.5  
1.2 58.6 62.1  
1.3 57.2 50  
59.9 49.4  
50.8 50  
53.1  
53.2  
52.4

|         |         |      |       |       |       |
|---------|---------|------|-------|-------|-------|
| RpM IFN | Mean    | 3.91 | 41.89 | 55.19 | 58.11 |
|         | Std Dev | 2.88 | 3.77  | 5.23  | 8.82  |

RpH IFN 7.78 54.58 62.02 64.64  
6.68 56.31 67.41 68.42  
**5.04** 78.1  
**6.94** 78.6

|         |         |      |       |       |       |
|---------|---------|------|-------|-------|-------|
| RpH IFN | Mean    | 6.61 | 55.45 | 64.72 | 72.44 |
|         | Std Dev | 1.15 | 1.22  | 3.81  | 7.00  |

RpL IFN Peg 4000 d/a 0 12.62 21.88 27.74  
0.48 11.27 21.26 23.35

|         |     |      |      |      |
|---------|-----|------|------|------|
| Mean    | 0.2 | 11.9 | 21.6 | 25.5 |
| Std Dev | 0.3 | 1.0  | 0.4  | 3.1  |

RpM IFN Peg 4000 d/a 0.04 18.57 29.4 32.04  
0 18.89 29.89 34.25  
1 15.7 34.2 40.6  
0.4 14.7 32.7 43.1  
3.1 20.7 30.3 33.4  
1.5 20.1 28.9 32.2

|         |     |      |      |      |
|---------|-----|------|------|------|
| Mean    | 1.0 | 18.1 | 30.9 | 35.9 |
| Std Dev | 1.2 | 2.4  | 2.1  | 4.7  |

RpH IFN Peg 4000 d/a 0.12 28.44 35.54 36.94  
0.32 27.08 35.05 36.74  
30.3  
30.4

|         |     |      |      |      |
|---------|-----|------|------|------|
| Mean    | 0.2 | 27.8 | 35.3 | 33.6 |
| Std Dev | 0.1 | 1.0  | 0.3  | 3.7  |

Mk Ctrl Peg 8000 d/a 2.6 1.9 2.8 2.7  
1.7 1.4 1.4 1.6  
1.8 1.8  
2.6 1.7  
2.1 1.8  
1.6 2.8  
2.1 2.2  
1.2 3.6  
1.4 2.9  
1.3 1.5  
1.5 1.6  
1.3 1.4  
2.1  
1.3

|         |     |     |     |     |
|---------|-----|-----|-----|-----|
| Mean    | 2.2 | 1.7 | 1.8 | 2.1 |
| Std Dev | 0.6 | 0.4 | 0.5 | 0.7 |

|          |                |                                                                                                                                                                |     |     |     |      |     |     |     |     |         |     |     |     |     |
|----------|----------------|----------------------------------------------------------------------------------------------------------------------------------------------------------------|-----|-----|-----|------|-----|-----|-----|-----|---------|-----|-----|-----|-----|
| Mk Ctrl  | Peg 2000 d/a   | 0                                                                                                                                                              | 0   | 0   | 0   |      |     |     |     |     |         |     |     |     |     |
|          |                | 0                                                                                                                                                              | 0   | 0   | 0   |      |     |     |     |     |         |     |     |     |     |
|          |                |                                                                                                                                                                |     |     | 0.6 |      |     |     |     |     |         |     |     |     |     |
|          |                |                                                                                                                                                                |     |     | 0.8 |      |     |     |     |     |         |     |     |     |     |
|          |                | <table><tr><td>Mean</td><td>0.0</td><td>0.0</td><td>0.0</td><td>0.4</td></tr><tr><td>Std Dev</td><td>0.0</td><td>0.0</td><td>0.0</td><td>0.4</td></tr></table> |     |     |     | Mean | 0.0 | 0.0 | 0.0 | 0.4 | Std Dev | 0.0 | 0.0 | 0.0 | 0.4 |
| Mean     | 0.0            | 0.0                                                                                                                                                            | 0.0 | 0.4 |     |      |     |     |     |     |         |     |     |     |     |
| Std Dev  | 0.0            | 0.0                                                                                                                                                            | 0.0 | 0.4 |     |      |     |     |     |     |         |     |     |     |     |
| Mk Ctrl  | Peg 4000-15d/a |                                                                                                                                                                |     |     | 1   |      |     |     |     |     |         |     |     |     |     |
|          |                |                                                                                                                                                                |     |     | 1   |      |     |     |     |     |         |     |     |     |     |
|          |                | <table><tr><td>Mean</td><td></td><td></td><td></td><td>1.0</td></tr><tr><td>Std Dev</td><td></td><td></td><td></td><td>0.0</td></tr></table>                   |     |     |     | Mean |     |     |     | 1.0 | Std Dev |     |     |     | 0.0 |
| Mean     |                |                                                                                                                                                                |     | 1.0 |     |      |     |     |     |     |         |     |     |     |     |
| Std Dev  |                |                                                                                                                                                                |     | 0.0 |     |      |     |     |     |     |         |     |     |     |     |
| Mk Ctrl  | Peg 1450 d/a   | 0                                                                                                                                                              | 0   | 0   | 0.3 |      |     |     |     |     |         |     |     |     |     |
|          |                | 0                                                                                                                                                              | 0   | 0   | 0   |      |     |     |     |     |         |     |     |     |     |
|          |                | <table><tr><td>Mean</td><td>0.0</td><td>0.0</td><td>0.0</td><td>0.2</td></tr><tr><td>Std Dev</td><td>0.0</td><td>0.0</td><td>0.0</td><td>0.2</td></tr></table> |     |     |     | Mean | 0.0 | 0.0 | 0.0 | 0.2 | Std Dev | 0.0 | 0.0 | 0.0 | 0.2 |
| Mean     | 0.0            | 0.0                                                                                                                                                            | 0.0 | 0.2 |     |      |     |     |     |     |         |     |     |     |     |
| Std Dev  | 0.0            | 0.0                                                                                                                                                            | 0.0 | 0.2 |     |      |     |     |     |     |         |     |     |     |     |
| Mk Ctrl  | Peg 400 d/a    |                                                                                                                                                                |     |     |     |      |     |     |     |     |         |     |     |     |     |
| RpM Ctrl | Peg 8000 d/a   | 1.8                                                                                                                                                            | 3   | 2.7 | 3   |      |     |     |     |     |         |     |     |     |     |
|          |                | 1.5                                                                                                                                                            | 2.5 | 2.3 | 2.2 |      |     |     |     |     |         |     |     |     |     |
|          |                |                                                                                                                                                                |     | 1.6 | 1.8 |      |     |     |     |     |         |     |     |     |     |
|          |                |                                                                                                                                                                |     | 1.8 | 2.9 |      |     |     |     |     |         |     |     |     |     |
|          |                |                                                                                                                                                                |     | 0.9 | 4.8 |      |     |     |     |     |         |     |     |     |     |
|          |                |                                                                                                                                                                |     | 1.8 | 2.1 |      |     |     |     |     |         |     |     |     |     |
|          |                |                                                                                                                                                                |     | 1.7 | 2.4 |      |     |     |     |     |         |     |     |     |     |
|          |                |                                                                                                                                                                |     | 1   | 4.2 |      |     |     |     |     |         |     |     |     |     |
|          |                |                                                                                                                                                                |     | 1.7 | 2.4 |      |     |     |     |     |         |     |     |     |     |
|          |                |                                                                                                                                                                |     | 1.6 | 2.5 |      |     |     |     |     |         |     |     |     |     |
|          |                |                                                                                                                                                                |     | 1.7 | 1.4 |      |     |     |     |     |         |     |     |     |     |
|          |                |                                                                                                                                                                |     | 1.3 | 1.4 |      |     |     |     |     |         |     |     |     |     |
|          |                |                                                                                                                                                                |     | 1.7 |     |      |     |     |     |     |         |     |     |     |     |
|          |                |                                                                                                                                                                |     | 2.1 |     |      |     |     |     |     |         |     |     |     |     |
|          |                | <table><tr><td>Mean</td><td>1.7</td><td>2.8</td><td>1.7</td><td>2.6</td></tr><tr><td>Std Dev</td><td>0.2</td><td>0.4</td><td>0.5</td><td>1.0</td></tr></table> |     |     |     | Mean | 1.7 | 2.8 | 1.7 | 2.6 | Std Dev | 0.2 | 0.4 | 0.5 | 1.0 |
| Mean     | 1.7            | 2.8                                                                                                                                                            | 1.7 | 2.6 |     |      |     |     |     |     |         |     |     |     |     |
| Std Dev  | 0.2            | 0.4                                                                                                                                                            | 0.5 | 1.0 |     |      |     |     |     |     |         |     |     |     |     |
| RpM Ctrl | Peg 2000 d/a   | 0                                                                                                                                                              | 0.5 | 0   | 0   |      |     |     |     |     |         |     |     |     |     |
|          |                | 0                                                                                                                                                              | 0   | 0.5 | 0   |      |     |     |     |     |         |     |     |     |     |
|          |                | <table><tr><td>Mean</td><td>0.0</td><td>0.3</td><td>0.3</td><td>0.0</td></tr><tr><td>Std Dev</td><td>0.0</td><td>0.4</td><td>0.4</td><td>0.0</td></tr></table> |     |     |     | Mean | 0.0 | 0.3 | 0.3 | 0.0 | Std Dev | 0.0 | 0.4 | 0.4 | 0.0 |
| Mean     | 0.0            | 0.3                                                                                                                                                            | 0.3 | 0.0 |     |      |     |     |     |     |         |     |     |     |     |
| Std Dev  | 0.0            | 0.4                                                                                                                                                            | 0.4 | 0.0 |     |      |     |     |     |     |         |     |     |     |     |

RpM Ctrl Peg 1450 d/a 0 0 0 0  
0 0 0 0

|         |     |     |     |     |
|---------|-----|-----|-----|-----|
| Mean    | 0.0 | 0.0 | 0.0 | 0.0 |
| Std Dev | 0.0 | 0.0 | 0.0 | 0.0 |

RpM Ctrl Peg 400 d/a 0 0 0 0  
0 0 0 0

|         |     |     |     |     |
|---------|-----|-----|-----|-----|
| Mean    | 0.0 | 0.0 | 0.0 | 0.0 |
| Std Dev | 0.0 | 0.0 | 0.0 | 0.0 |

Mk IFN Peg 8000 d/a 2.3 2.2 2.3 2.6  
2.8 2.7 2.5 3  
2.3 1.9 1.5 1.6  
1.9 2.4 1.8 1.9

|     |     |
|-----|-----|
| 2.2 | 6   |
| 2.8 | 2.6 |
| 2.8 | 2.6 |
| 2.2 | 3.7 |
| 1.3 | 3.5 |
| 1.6 | 3.3 |
| 1.6 | 1.8 |
| 1.6 | 2.3 |
| 1.6 | 1.6 |
| 1.6 | 1.8 |
| 2.2 |     |
| 2.5 |     |

|         |     |     |     |     |
|---------|-----|-----|-----|-----|
| Mean    | 2.3 | 2.3 | 2.0 | 2.7 |
| Std Dev | 0.4 | 0.3 | 0.5 | 1.2 |

Mk IFN Peg 2000 d/a 0 0 0 0  
0 0 0 0  
0.6  
1.4

|         |     |     |     |     |
|---------|-----|-----|-----|-----|
| Mean    | 0.0 | 0.0 | 0.0 | 0.5 |
| Std Dev | 0.0 | 0.0 | 0.0 | 0.7 |

Mk IFN Peg 4000-15d/a 1.2  
1.2

|         |  |     |
|---------|--|-----|
| Mean    |  | 1.2 |
| Std Dev |  | 0.0 |

Mk IFN Peg 1450 d/a 0 0 0 0  
0 0 0 0

|         |     |     |     |     |
|---------|-----|-----|-----|-----|
| Mean    | 0.0 | 0.0 | 0.0 | 0.0 |
| Std Dev | 0.0 | 0.0 | 0.0 | 0.0 |

Mk IFN Peg 400 d/a

RpM IFN Peg 8000 d/a 2.8 4.1 3.3 4.8  
2.2 3.6 3.2 3.9  
2 2.5 3 3.5  
2 2.5 3.3 4.3

|     |     |
|-----|-----|
| 3.9 | 4.7 |
| 5.1 | 5.7 |
| 5.5 | 5.1 |
| 3.9 | 5.2 |
| 4.6 | 8.5 |
| 4.7 | 7.3 |
| 5.2 | 5.7 |
| 5   | 7.3 |
| 5.1 | 3.4 |
| 5.8 | 2.9 |
| 6.5 | 3   |
| 4.9 |     |

|         |     |     |     |     |
|---------|-----|-----|-----|-----|
| Mean    | 2.3 | 3.2 | 4.6 | 5.0 |
| Std Dev | 0.4 | 0.8 | 1.0 | 1.7 |

RpM IFN Peg 2000 d/a 1.5 45.7 65.3 78.3  
1.4 44.3 66.6 77.5  
5.7 44.3 51.5 53.6  
3.1 43.6 53 53.5

|         |     |      |      |      |
|---------|-----|------|------|------|
| Mean    | 2.9 | 44.5 | 59.1 | 65.7 |
| Std Dev | 2.0 | 0.9  | 8.0  | 14.1 |

RpM IFN Peg 1450 d/a 1.8 37.7 59.1 73.1  
2.1 32.8 53.1 61.9  
2.8 37.7 47.9 51.1  
4.2 40.6 49.1 53.2

|         |     |      |      |      |
|---------|-----|------|------|------|
| Mean    | 2.7 | 37.2 | 52.3 | 59.8 |
| Std Dev | 1.1 | 3.2  | 5.0  | 10.0 |

RpM IFN Peg 400 d/a 2.4 30.3 48.9 63.4  
2.1 25.6 39.8 52.2  
2.5 28.4 36.7 43.5  
2.9 26.2 34.6 41.1

|         |     |      |      |      |
|---------|-----|------|------|------|
| Mean    | 2.5 | 27.6 | 40.0 | 50.1 |
| Std Dev | 0.3 | 2.2  | 6.3  | 10.1 |

RpM IFN Peg 4000-15d/a 1.4 32.9 54.8 62.8  
2.1 32.7 50.2 57.8

|         |     |      |      |      |
|---------|-----|------|------|------|
| Mean    | 1.8 | 32.8 | 52.5 | 60.3 |
| Std Dev | 0.5 | 0.1  | 3.3  | 3.5  |

RpM IFN Peg 4000-7.5d/a 2.4 45 63.6 75.2  
3.6 36.7 54.1 62.6

|         |     |      |      |      |
|---------|-----|------|------|------|
| Mean    | 3.0 | 40.9 | 58.9 | 68.9 |
| Std Dev | 0.8 | 5.9  | 6.7  | 8.9  |

RpM IFN Peg 8000-7.5d/a 1.4 28.4 44.2 58.8  
1.6 21.7 37.6 49

|         |     |      |      |      |
|---------|-----|------|------|------|
| Mean    | 1.5 | 25.1 | 40.9 | 53.9 |
| Std Dev | 0.1 | 4.7  | 4.7  | 6.9  |

RpH Ctrl Peg 4000-15d/a 3.3  
1.4

|         |  |     |
|---------|--|-----|
| Mean    |  | 2.4 |
| Std Dev |  | 1.3 |

RpH Ctrl Peg 2000 d/a 1.6  
1.7

|         |  |     |
|---------|--|-----|
| Mean    |  | 1.7 |
| Std Dev |  | 0.1 |

RpH IFN Peg 4000-15d/a 63.9  
62.3

|         |  |      |
|---------|--|------|
| Mean    |  | 63.1 |
| Std Dev |  | 1.1  |

RpH IFN Peg 2000 d/a 67.3  
67.9

|         |  |      |
|---------|--|------|
| Mean    |  | 67.6 |
| Std Dev |  | 0.4  |

The numbers 1, 2, 3, & 4 indicate the hours after addition of the rickettsiae or mock-infection.

|         |            | 1 | 2    | 3   | 4    |
|---------|------------|---|------|-----|------|
| Mk Ctrl | Peg 4000 a |   | 0.45 | 0.4 | 0.41 |
|         |            |   | 0.45 | 0.4 | 0.3  |

|         |  |     |     |     |
|---------|--|-----|-----|-----|
| Mean    |  | 0.5 | 0.4 | 0.4 |
| Std Dev |  | 0.0 | 0.0 | 0.1 |

|          |            |  |      |      |      |
|----------|------------|--|------|------|------|
| RpL Ctrl | Peg 4000 a |  | 0.31 | 0.53 | 0.37 |
|          |            |  | 0.81 | 0.51 | 0.36 |

|         |  |     |     |     |
|---------|--|-----|-----|-----|
| Mean    |  | 0.6 | 0.5 | 0.4 |
| Std Dev |  | 0.4 | 0.0 | 0.0 |



RpM Ctrl      Peg 4000 a      0.39      0.4      0.2  
                                          0.38      0.1      0.43

|         |     |     |     |
|---------|-----|-----|-----|
| Mean    | 0.4 | 0.3 | 0.3 |
| Std Dev | 0.0 | 0.2 | 0.2 |

RpH Ctrl      Peg 4000 a      0.18      0.69      1.71  
                                          0.18      0.59      0.9

|         |     |     |     |
|---------|-----|-----|-----|
| Mean    | 0.2 | 0.6 | 1.3 |
| Std Dev | 0.0 | 0.1 | 0.6 |

Mk IFN      Peg 4000 a      0.37      0.62      0.69  
                                          0.31      0.54      0.58

|         |     |     |     |
|---------|-----|-----|-----|
| Mean    | 0.3 | 0.6 | 0.6 |
| Std Dev | 0.0 | 0.1 | 0.1 |

RpL IFN      Peg 4000 a      10.15    15.79    18.92  
                                          12.33    17.93    19.85

|         |      |      |      |
|---------|------|------|------|
| Mean    | 11.2 | 16.9 | 19.4 |
| Std Dev | 1.5  | 1.5  | 0.7  |

RpM IFN      Peg 4000 a      15.42    21.64    23.57  
                                          18.35    25.45    28.4

|         |      |      |      |
|---------|------|------|------|
| Mean    | 16.9 | 23.5 | 26.0 |
| Std Dev | 2.1  | 2.7  | 3.4  |

RpH IFN      Peg 4000 a      25.24    32.72    35.06  
                                          25.47    31.46    31.36

|         |      |      |      |
|---------|------|------|------|
| Mean    | 25.4 | 32.1 | 33.2 |
| Std Dev | 0.2  | 0.9  | 2.6  |

Mk Ctrl      Peg 8000 a      1.9  
                                          1.6  
                                          1.9  
                                          1.4

|         |  |     |
|---------|--|-----|
| Mean    |  | 1.7 |
| Std Dev |  | 0.2 |

Mk Ctrl      Peg 8000 a15      1      2      3      4  
                                          1.2    1.5  
                                          1.1    1.7  
                                          1.4  
                                          1.4

|         |  |     |     |
|---------|--|-----|-----|
| Mean    |  | 1.2 | 1.5 |
| Std Dev |  | 0.1 | 0.1 |

|                 |                   |     |
|-----------------|-------------------|-----|
| <i>RpM Ctrl</i> | <i>Peg 8000 a</i> | 1.4 |
|                 |                   | 1.5 |
|                 |                   | 1.7 |
| Mean            |                   | 1.5 |
| Std Dev         |                   | 0.2 |

|                 |                     |     |     |
|-----------------|---------------------|-----|-----|
| <i>RpM Ctrl</i> | <i>Peg 8000 a15</i> | 1.2 | 1.5 |
|                 |                     | 1.3 | 1.6 |
|                 |                     |     | 1.3 |
| Mean            |                     | 1.3 | 1.5 |
| Std Dev         |                     | 0.1 | 0.2 |

|         |            |  |     |
|---------|------------|--|-----|
| Mk IFN  | Peg 8000 a |  | 1.8 |
|         |            |  | 1.9 |
|         |            |  | 1.5 |
|         |            |  | 1.5 |
|         |            |  | 1.2 |
|         |            |  |     |
| Mean    |            |  | 1.6 |
| Std Dev |            |  | 0.3 |

Mk IFN

Peg 8000 a15

1.5

1.6

1.6

1.3

</

|                |                   |     |
|----------------|-------------------|-----|
| <i>RpM IFN</i> | <i>Peg 8000 a</i> | 2.9 |
|                |                   | 3.2 |
|                |                   | 2.8 |
| Mean           |                   | 3.0 |
| Std Dev        |                   | 0.2 |

|                |                     |     |     |
|----------------|---------------------|-----|-----|
| <i>RpM IFN</i> | <i>Peg 8000 a15</i> | 4.2 | 3.0 |
|                |                     | 5.3 | 2.8 |
|                |                     |     | 2.6 |
| Mean           |                     | 4.8 | 2.8 |
| Std Dev        |                     | 0.8 | 0.2 |

DEFINITION OF ABBREVIATIONS IN THIS TABLE

The numbers 1, 2, 3, & 4 indicate the hours after addition of the rickettsiae or mock-infection.

Mk Ctrl=Untreated, mock-infected  
RpL Ctrl=Untreated, RpLow infected  
RpM Ctrl=Untreated, RpMedium infected  
RpH Ctrl=Untreated, RpHigh infected

Mk IFN=IFN-treated, mock-infected  
RpL IFN=IFN-treated, RpLow infected  
RpM IFN=IFN-treated, RpMedium infected  
RpH IFN=IFN-treated, RpHigh infected

See Figure 3 and the results section for additional information about RpL, RpM, and RpH.  
These indicate the use of different concentrations of rickettsiae.

"d/a" indicates that PEG was added at the time of infection or mock-infection  
"a15" indicates that PEG was added 15 minutes after infection or mock-infection  
"a" indicates that PEG was added 1 hour after infection or mock-infection

Pegs were generally used at 30 mM, except for Peg 8000, which was used at 15 mM.  
In some instances, Peg 4000 was used at 15 mM & 7 mM; and Peg 8000 was used at 7.5 mM.

Peg 4000-15d/a indicates that Peg 4000 was used at 15 mM  
Peg 4000-7.5d/a indicates that Peg 4000 was used at 7.5 mM  
Peg 8000-7.5d/a indicates that Peg 8000 was used at 7.5 mM

TABLE S4, SHEET 2 (pages 15-18) -- PERCENTAGE OF TOTAL LDH RELEASED (means & standard deviations)

The next 4 pages represent Sheet 2 of Table S4. They provide a summary of some of the data (means and standard deviations) that are shown in Sheet 1 of Table S4.

The means below are highlighted in yellow.

The standard deviations below are highlighted in orange.

|         |              | Hours |     |     |     |
|---------|--------------|-------|-----|-----|-----|
|         |              | 1     | 2   | 3   | 4   |
| Mk Ctrl | No addition  | 0.2   | 0.4 | 0.4 | 0.7 |
|         |              | 0.2   | 0.4 | 0.6 | 0.5 |
|         |              |       |     |     |     |
| Mk Ctrl | Peg 1450 d/a | 0.0   | 0.0 | 0.0 | 0.2 |
|         |              | 0.0   | 0.0 | 0.0 | 0.2 |
|         |              |       |     |     |     |
| Mk Ctrl | Peg 2000 d/a | 0.0   | 0.0 | 0.0 | 0.4 |
|         |              | 0.0   | 0.0 | 0.0 | 0.4 |
|         |              |       |     |     |     |
| Mk Ctrl | Peg 4000 d/a | 1.3   | 1.7 | 1.5 | 1.2 |
|         |              | 1.5   | 0.9 | 1.0 | 1.0 |
|         |              |       |     |     |     |
| Mk Ctrl | Peg 8000 d/a | 2.2   | 1.7 | 1.8 | 2.1 |
|         |              | 0.6   | 0.4 | 0.5 | 0.7 |
|         |              |       |     |     |     |
| Mk Ctrl | Peg 4000 a   |       | 0.5 | 0.4 | 0.4 |
|         |              |       | 0.0 | 0.0 | 0.1 |
|         |              |       |     |     |     |
| Mk Ctrl | Peg 8000 a   |       |     |     | 1.7 |
|         |              |       |     |     | 0.2 |
|         |              |       |     |     |     |
| Mk Ctrl | Peg 8000 a15 |       | 1.2 | 1.5 |     |
|         |              |       | 0.1 | 0.1 |     |

|          |              | Hours |     |     |     |
|----------|--------------|-------|-----|-----|-----|
|          |              | 1     | 2   | 3   | 4   |
| RpM Ctrl | No addition  | 0.3   | 0.6 | 0.6 | 0.8 |
|          |              | 0.4   | 0.4 | 0.7 | 0.4 |
| RpM Ctrl | Peg 400 d/a  | 0.0   | 0.0 | 0.0 | 0.0 |
|          |              | 0.0   | 0.0 | 0.0 | 0.0 |
| RpM Ctrl | Peg 1450 d/a | 0.0   | 0.0 | 0.0 | 0.0 |
|          |              | 0.0   | 0.0 | 0.0 | 0.0 |
| RpM Ctrl | Peg 2000 d/a | 0.0   | 0.3 | 0.3 | 0.0 |
|          |              | 0.0   | 0.4 | 0.4 | 0.0 |
| RpM Ctrl | Peg 4000 d/a | 0.8   | 1.2 | 1.6 | 1.6 |
|          |              | 1.0   | 1.1 | 1.2 | 1.1 |
| RpM Ctrl | Peg 8000 d/a | 1.7   | 2.8 | 1.7 | 2.6 |
|          |              | 0.2   | 0.4 | 0.5 | 1.0 |
| RpM Ctrl | Peg 4000 a   |       | 0.4 | 0.3 | 0.3 |
|          |              |       | 0.0 | 0.2 | 0.2 |
| RpM Ctrl | Peg 8000 a   |       |     |     | 1.5 |
|          |              |       |     |     | 0.2 |
| RpM Ctrl | Peg 8000 a15 |       | 1.3 | 1.5 |     |
|          |              |       | 0.1 | 0.2 |     |

Data for Figure 4

Percentage of Total LDH Released in IFN-treated C166 Cultures Infected with *R. prowazekii*

| Hours | No addition |         | Peg 1450 d/a |         | Peg 2000 d/a |         | Peg 4000 d/a |         | Peg 8000 d/a |         |
|-------|-------------|---------|--------------|---------|--------------|---------|--------------|---------|--------------|---------|
|       | Mean        | Std dev | Mean         | Std dev | Mean         | Std dev | Mean         | Std dev | Mean         | Std dev |
| 1     | 3.9         | 2.9     | 2.7          | 1.1     | 2.9          | 2.0     | 1.0          | 1.2     | 2.3          | 0.4     |
| 2     | 41.9        | 3.8     | 37.2         | 3.2     | 44.5         | 0.9     | 18.1         | 2.4     | 3.2          | 0.8     |
| 3     | 55.2        | 5.2     | 52.3         | 5.0     | 59.1         | 8.0     | 30.9         | 2.1     | 4.6          | 1.0     |
| 4     | 58.1        | 8.8     | 59.8         | 10.0    | 65.7         | 14.1    | 35.9         | 4.7     | 5.0          | 1.7     |



|        |              | Hours |     |     |     |
|--------|--------------|-------|-----|-----|-----|
|        |              | 1     | 2   | 3   | 4   |
| Mk IFN | No addition  | 0.4   | 0.4 | 0.6 | 0.7 |
|        |              | 0.5   | 0.7 | 0.6 | 0.6 |
|        |              |       |     |     |     |
| Mk IFN | Peg 1450 d/a | 0.0   | 0.0 | 0.0 | 0.0 |
|        |              | 0.0   | 0.0 | 0.0 | 0.0 |
| Mk IFN | Peg 2000 d/a | 0.0   | 0.0 | 0.0 | 0.5 |
|        |              | 0.0   | 0.0 | 0.0 | 0.7 |
| Mk IFN | Peg 4000 d/a | 1.2   | 2.1 | 4.1 | 4.8 |
|        |              | 1.6   | 1.7 | 1.1 | 2.5 |
| Mk IFN | Peg 8000 d/a | 2.3   | 2.3 | 2.0 | 2.7 |
|        |              | 0.4   | 0.3 | 0.5 | 1.2 |
|        |              |       |     |     |     |
| Mk IFN | Peg 4000 a   |       | 0.3 | 0.6 | 0.6 |
|        |              |       | 0.0 | 0.1 | 0.1 |
|        |              |       |     |     |     |
| Mk IFN | Peg 8000 a   |       |     |     | 1.6 |
|        |              |       |     |     | 0.3 |
|        |              |       |     |     |     |
| Mk IFN | Peg 8000 a15 |       |     | 1.6 | 1.5 |
|        |              |       |     | 0.1 | 0.2 |

|         |              | Hours |      |      |      |
|---------|--------------|-------|------|------|------|
|         |              | 1     | 2    | 3    | 4    |
| RpM IFN | No addition  | 3.9   | 41.9 | 55.2 | 58.1 |
|         |              | 2.9   | 3.8  | 5.2  | 8.8  |
| RpM IFN | Peg 400 d/a  | 2.5   | 27.6 | 40.0 | 50.1 |
|         |              | 0.3   | 2.2  | 6.3  | 10.1 |
| RpM IFN | Peg 1450 d/a | 2.7   | 37.2 | 52.3 | 59.8 |
|         |              | 1.1   | 3.2  | 5.0  | 10.0 |
| RpM IFN | Peg 2000 d/a | 2.9   | 44.5 | 59.1 | 65.7 |
|         |              | 2.0   | 0.9  | 8.0  | 14.1 |
| RpM IFN | Peg 4000 d/a | 1.0   | 18.1 | 30.9 | 35.9 |
|         |              | 1.2   | 2.4  | 2.1  | 4.7  |
| RpM IFN | Peg 8000 d/a | 2.3   | 3.2  | 4.6  | 5.0  |
|         |              | 0.4   | 0.8  | 1.0  | 1.7  |
| RpM IFN | Peg 4000 a   |       | 16.9 | 23.5 | 26.0 |
|         |              |       | 2.1  | 2.7  | 3.4  |
| RpM IFN | Peg 8000 a   |       |      |      | 3.0  |
|         |              |       |      |      | 0.2  |
| RpM IFN | Peg 8000 a15 |       | 4.8  | 2.8  |      |
|         |              |       | 0.8  | 0.2  |      |

|         |              | Hours |      |      |      |
|---------|--------------|-------|------|------|------|
|         |              | 1     | 2    | 3    | 4    |
| RpM IFN | No addition  | 3.9   | 41.9 | 55.2 | 58.1 |
|         |              | 2.9   | 3.8  | 5.2  | 8.8  |
| RpM IFN | Peg 1450 d/a | 2.7   | 37.2 | 52.3 | 59.8 |
|         |              | 1.1   | 3.2  | 5.0  | 10.0 |
| RpM IFN | Peg 2000 d/a | 2.9   | 44.5 | 59.1 | 65.7 |
|         |              | 2.0   | 0.9  | 8.0  | 14.1 |
| RpM IFN | Peg 4000 d/a | 1.0   | 18.1 | 30.9 | 35.9 |
|         |              | 1.2   | 2.4  | 2.1  | 4.7  |
| RpM IFN | Peg 8000 d/a | 2.3   | 3.2  | 4.6  | 5.0  |
|         |              | 0.4   | 0.8  | 1.0  | 1.7  |
| RpM IFN | Peg 4000 a   |       | 16.9 | 23.5 | 26.0 |
|         |              |       | 2.1  | 2.7  | 3.4  |
| RpM IFN | Peg 8000a    |       |      |      | 3.0  |
|         |              |       |      |      | 0.2  |
| RpM IFN | Peg 8000a15  |       |      | 4.8  | 2.8  |
|         |              |       |      | 0.8  | 0.2  |
