# Supplementary material for: Involvement of Pore Formation and Osmotic Lysis in the Rapid Killing of Gamma Interferon-Pretreated C166 Endothelial Cells by Rickettsia prowazekii
Source: MDPI journal article supplement (doi:10.3390/tropicalmed7080163), 2022-08-01
Supplement: s1 [file s1]

Table S1

Data for Figure 1

Percent trypan blue-positive cells

| Exp 43  |        |        |        |        |                        |                        |                        |                        |                        |                        |                        |                        |
|---------|--------|--------|--------|--------|------------------------|------------------------|------------------------|------------------------|------------------------|------------------------|------------------------|------------------------|
| Exp44   | RpE    | RpE    | Mock   | Mock   | Uninfected prep (1/10) | Uninfected prep (1/20) |
| Exp 49  | C166 C | C166 I | C166 C | C166 I | C166 Control           | C166 Control           | C166 IFN               |
| Expt 51 | 2.6    | 44.4   | 0.0    | 0.0    | 11.6                   | 3.7                    | 8.2                    | 3.0                    |                        |                        |                        |                        |
| Exp53   | 7.6    | 39.1   | 1.0    | 0.0    | 8.7                    | 3.4                    | 11.5                   | 3.8                    |                        |                        |                        |                        |
| Exp56   | 1.0    | 64.7   | 1.0    | 1.0    | 7.8                    |                        | 12.9                   |                        |                        |                        |                        |                        |
| Exp57   | 1.0    | 98.0   | 0.0    | 0.0    |                        |                        |                        |                        |                        |                        |                        |                        |
| Exp59   | 2.0    | 92.4   | 1.0    | 0.0    |                        |                        |                        |                        |                        |                        |                        |                        |
| Exp60   | 4.0    | 87.4   | 0.0    | 0.0    |                        |                        |                        |                        |                        |                        |                        |                        |
| Exp62   | 7.1    | 81.9   | 0.0    | 0.0    |                        |                        |                        |                        |                        |                        |                        |                        |
| Exp63   | 3.3    | 95.8   | 0.0    | 0.0    |                        |                        |                        |                        |                        |                        |                        |                        |
| Exp64   | 5.0    | 93.8   | 0.0    | 1.0    |                        |                        |                        |                        |                        |                        |                        |                        |
|         | 1.0    | 75.2   | 1.0    | 0.0    |                        |                        |                        |                        |                        |                        |                        |                        |
|         | 0.0    | 82.1   | 1.0    | 0.0    |                        |                        |                        |                        |                        |                        |                        |                        |
|         | 0.0    | 80.5   | 2.0    | 0.0    |                        |                        |                        |                        |                        |                        |                        |                        |
|         | 3.0    | 48.5   | 1.0    | 2.0    |                        |                        |                        |                        |                        |                        |                        |                        |
|         | 2.0    | 48.3   | 1.0    | 1.0    |                        |                        |                        |                        |                        |                        |                        |                        |
|         | 3.0    | 84.2   | 0.0    | 0.0    |                        |                        |                        |                        |                        |                        |                        |                        |
|         | 1.9    | 86.6   | 1.0    | 1.0    |                        |                        |                        |                        |                        |                        |                        |                        |
|         | 2.0    | 89.7   | 0.0    | 2.0    |                        |                        |                        |                        |                        |                        |                        |                        |
|         | 3.4    | 88.2   | 0.0    | 2.0    |                        |                        |                        |                        |                        |                        |                        |                        |
|         | 0.0    | 95.6   | 0.0    | 1.0    |                        |                        |                        |                        |                        |                        |                        |                        |
|         | 1.0    | 94.5   |        | 0.0    |                        |                        |                        |                        |                        |                        |                        |                        |
|         | 12.0   | 90.1   |        | 1.0    |                        |                        |                        |                        |                        |                        |                        |                        |
|         | 9.6    | 96.3   |        |        |                        |                        |                        |                        |                        |                        |                        |                        |
|         | 3.6    | 95.2   |        |        |                        |                        |                        |                        |                        |                        |                        |                        |
|         | 7.5    | 96.2   |        |        |                        |                        |                        |                        |                        |                        |                        |                        |
|         |        | 96.6   |        |        |                        |                        |                        |                        |                        |                        |                        |                        |
|         |        | 97.1   |        |        |                        |                        |                        |                        |                        |                        |                        |                        |
| Avg     | 3.5    | 82.4   | 0.5    | 0.6    | 9.4                    | 3.6                    | 10.9                   | 3.4                    |                        |                        |                        |                        |
| Std Dev | 3.2    | 18.0   | 0.6    | 0.7    | 2.0                    | 0.2                    | 2.4                    | 0.6                    |                        |                        |                        |                        |
|         | 3.5    | 82.4   | 0.5    | 0.6    | 9.4                    | 3.6                    | 10.9                   | 3.4                    |                        |                        |                        |                        |
|         | 3.2    | 18.0   | 0.6    | 0.7    | 2.0                    | 0.2                    | 2.4                    | 0.6                    |                        |                        |                        |                        |
|         | 3.5    | 82.4   | 0.5    | 0.6    | 9.4                    | 3.6                    | 10.9                   | 3.4                    |                        |                        |                        |                        |
|         | 3.2    | 18.0   | 0.6    | 0.7    | 2.0                    | 0.2                    | 2.4                    | 0.6                    |                        |                        |                        |                        |

C=Untreated control cultures

I=Interferon-treated cultures

M=Mock-infected

UP (uninfected prep)= lysate of uninfected L929 cells

RpE=*Rickettsia prowazekii* Madrid E
