# Supplementary material for: Involvement of Pore Formation and Osmotic Lysis in the Rapid Killing of Gamma Interferon-Pretreated C166 Endothelial Cells by Rickettsia prowazekii
Source: MDPI journal article supplement (doi:10.3390/tropicalmed7080163), 2022-08-01
Supplement: s1 [file s1]

Table S2

## Rickettsial Infection Data for Figure 1

|         |          |        | C+RpE          |       |        | I+RpE |      |       |        |       |
|---------|----------|--------|----------------|-------|--------|-------|------|-------|--------|-------|
|         | Dilution | Prep # | %R             | RI    | NR*100 | NR    | %R   | RI    | NR*100 | NR    |
| Exp 43  | 1/500    | 8      | 100            | 16.15 | 1615   | 16.15 | 99   | 21.98 | 2176   | 21.76 |
| Exp 44  | 1/1000   | 8      | 94             | 8.99  | 845    | 8.45  | 96   | 10.69 | 1026   | 10.26 |
|         | 1/1000   | 8      | 93             | 10.25 | 953    | 9.53  | 96   | 8.04  | 772    | 7.72  |
| Exp 49  | 1/500    | 10     | 79             | 5.81  | 459    | 4.59  | 83   | 6.66  | 553    | 5.53  |
| Exp 51  | 1/300    | 10     | 84             | 7.24  | 608    | 6.08  | 79   | 8.73  | 690    | 6.9   |
|         | 1/300    | 10     | 89             | 11.19 | 996    | 9.96  | 94   | 11.24 | 1057   | 10.57 |
| Exp 53  | 1/250    | 10     | 99             | 17.75 | 1757   | 17.57 | 100  | 28.04 | 2804   | 28.04 |
| Exp 56  | 1/260    | 10     | 98             | 19.93 | 1953   | 19.53 | 100  | 18.13 | 1813   | 18.13 |
| Exp 59  | 1/200    | 10     | 99             | 14.59 | 1444   | 14.44 | 98   | 13.46 | 1319   | 13.19 |
| Exp 59  | 1/200    | 10     | 95             | 12.4  | 1178   | 11.78 | 100  | 15.4  | 1540   | 15.4  |
| Exp 60  | 1/200    | 10     | 100            | 17.22 | 1722   | 17.22 | 100  | 19.36 | 1936   | 19.36 |
| Exp 60  | 1/200    | 10     | 96             | 14.06 | 1350   | 13.5  | 99   | 16.36 | 1620   | 16.2  |
| Exp 62  | 1/200    | 10     | 98             | 14.37 | 1408   | 14.08 | 100  | 15.61 | 1561   | 15.61 |
| Exp 62  | 1/200    | 10     | 97             | 14.88 | 1443   | 14.33 | 99   | 14.62 | 1447   | 14.47 |
| Exp 63  | 1/200    | 10     | 97             | 9.14  | 887    | 8.87  | 100  | 18.74 | 1874   | 18.74 |
| Exp 63  | 1/200    | 10     | 100            | 23.77 | 2377   | 23.77 | 100  | 27.94 | 2794   | 27.94 |
| Exp 64  | 1/200    | 10     | not determined |       |        |       |      |       |        |       |
| Exp 57  | 1/260    | 10     | not determined |       |        |       |      |       |        |       |
| AVG     |          |        | 94.9           | 13.6  | 1312.2 | 13.1  | 96.4 | 15.9  | 1561.4 | 15.6  |
| STD DEV |          |        | 6.1            | 4.8   | 511.0  | 5.1   | 6.3  | 6.4   | 671.2  | 6.7   |

%R= percent infected

RI=rickettsiae per infected cell

NR\*100=rickettsiae in 100 cells

NR=rickettsiae per cell

C=Untreated Control cultures

I=Interferon-treated cultures

RpE=*Rickettsia prowazekii* Madrid E
