# Supplementary material for: Involvement of Pore Formation and Osmotic Lysis in the Rapid Killing of Gamma Interferon-Pretreated C166 Endothelial Cells by Rickettsia prowazekii
Source: MDPI journal article supplement (doi:10.3390/tropicalmed7080163), 2022-08-01
Supplement: s1 [file s1]

**Table S3**                      **Percentage of Total LDH Released**

**Data for Figure 3**

| Hours                 | Mk Ctrl   |     | RpL Ctrl |     | RpM Ctrl  |     | RpH Ctrl |     | Mk IFN    |     | RpL IFN  |     | RpM IFN   |     | RpH IFN  |     |
|-----------------------|-----------|-----|----------|-----|-----------|-----|----------|-----|-----------|-----|----------|-----|-----------|-----|----------|-----|
|                       | Mean      | SD  | Mean     | SD  |
| 1                     | 0.2       | 0.2 | 0.0      | 0.0 | 0.3       | 0.4 | 0.1      | 0.2 | 0.4       | 0.5 | 1.6      | 0.4 | 3.9       | 2.9 | 6.6      | 1.2 |
| 2                     | 0.4       | 0.4 | 0.5      | 0.1 | 0.6       | 0.4 | 0.2      | 0.3 | 0.4       | 0.7 | 28.4     | 1.4 | 41.9      | 3.8 | 55.4     | 1.2 |
| 3                     | 0.4       | 0.6 | 1.6      | 0.7 | 0.6       | 0.7 | 1.3      | 0.2 | 0.6       | 0.6 | 39.4     | 2.1 | 55.2      | 5.2 | 64.7     | 3.8 |
| 4                     | 0.7       | 0.5 | 1.0      | 0.2 | 0.8       | 0.4 | 1.4      | 0.1 | 0.7       | 0.6 | 44.0     | 1.3 | 58.1      | 8.8 | 72.4     | 7.0 |
| <b># of</b>           | <b>10</b> |     | <b>4</b> |     | <b>11</b> |     | <b>4</b> |     | <b>10</b> |     | <b>4</b> |     | <b>11</b> |     | <b>4</b> |     |
| <b>determinations</b> | <b>6</b>  |     | <b>2</b> |     |
|                       | <b>16</b> |     | <b>2</b> |     | <b>16</b> |     | <b>2</b> |     | <b>16</b> |     | <b>2</b> |     | <b>16</b> |     | <b>2</b> |     |
|                       | <b>15</b> |     | <b>2</b> |     | <b>13</b> |     | <b>4</b> |     | <b>15</b> |     | <b>2</b> |     | <b>13</b> |     | <b>4</b> |     |

Mk Ctrl=Untreated, mock-infected

RpL Ctrl=Untreated, RpLow infected

RpM Ctrl=Untreated, RpMedium infected

RpH Ctrl=Untreated, RpHigh infected

Mk IFN=IFN-treated, mock-infected

RpL IFN=IFN-treated, RpLow infected

RpM IFN=IFN-treated, RpMedium infected

RpH IFN=IFN-treated, RpHigh infected

SD, standard deviation

LDH, lactate dehydrogenase
