# Supplementary material for: Involvement of Pore Formation and Osmotic Lysis in the Rapid Killing of Gamma Interferon-Pretreated C166 Endothelial Cells by Rickettsia prowazekii
Source: MDPI journal article supplement (doi:10.3390/tropicalmed7080163), 2022-08-01
Supplement: s1 [file s1]

**PANEL A**

**Transmitted light**

**Fluorescence**

**Transmitted light**

**Fluorescence**

**Mock-  
infected**

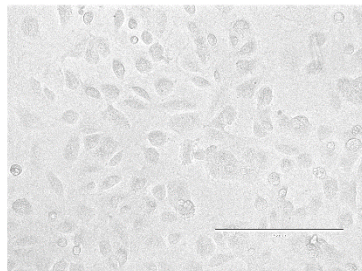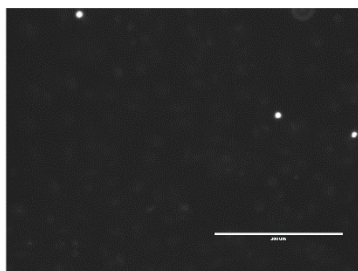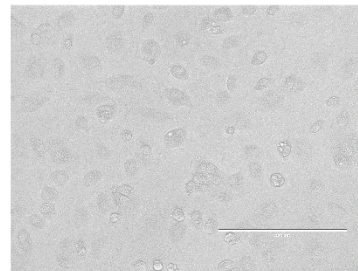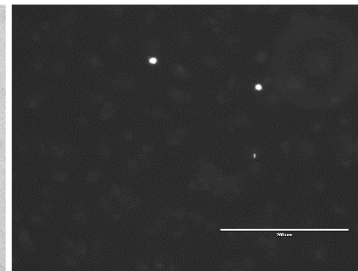

**Mock-  
infected  
+PEG 8000**

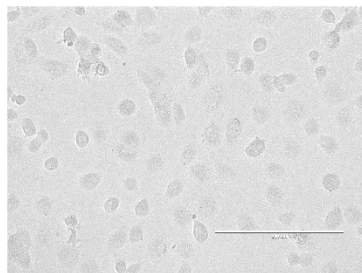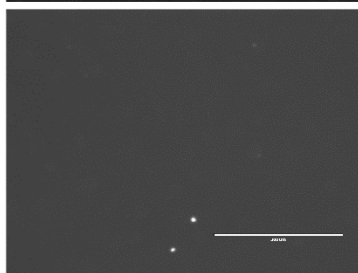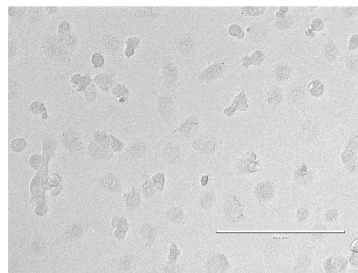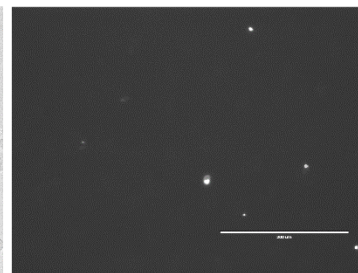

**Infected**

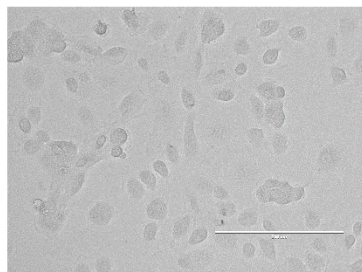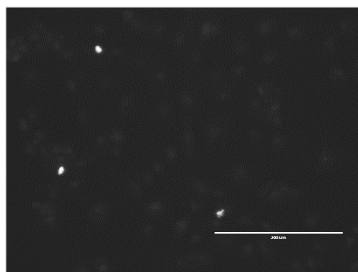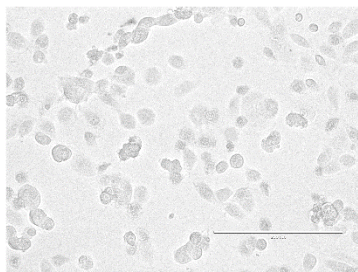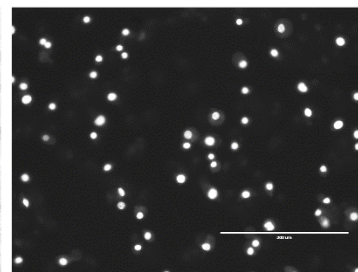

**Infected  
+PEG 8000**

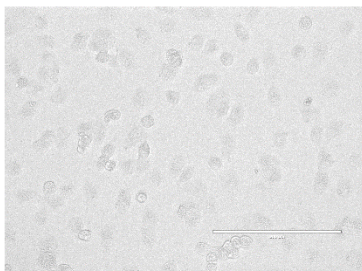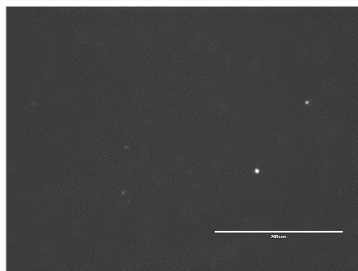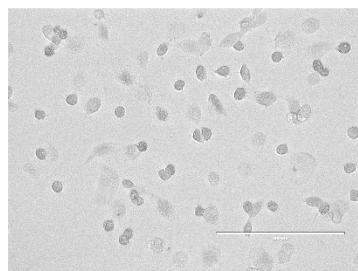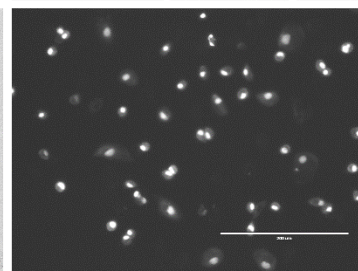

**Untreated Cells**

**Interferon-treated Cells**



**PANEL B**

**Transmitted light**

**Fluorescence**

**Transmitted light**

**Fluorescence**

**Mock-  
infected**

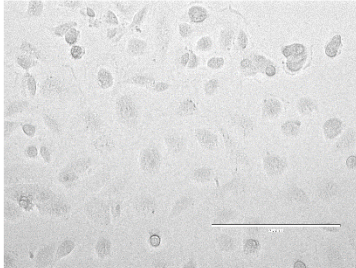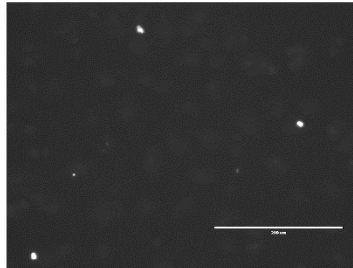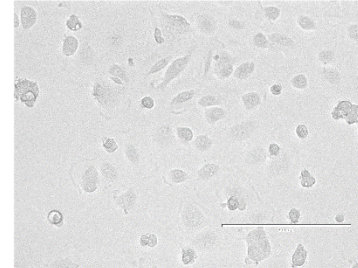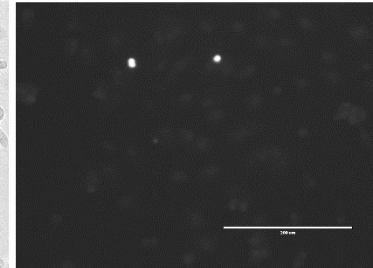

**Mock-  
infected  
+PEG 8000**

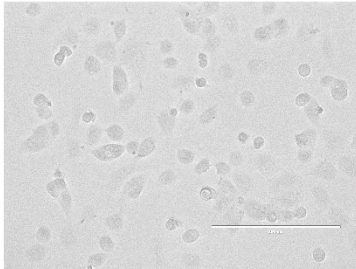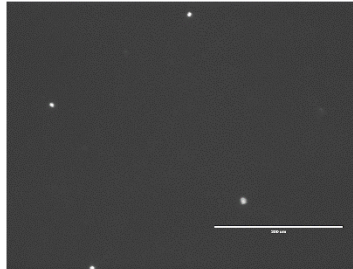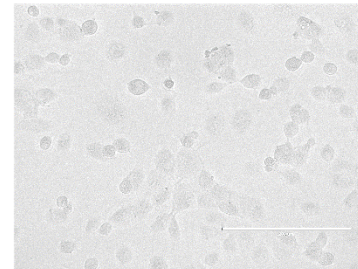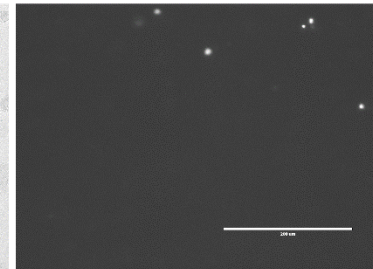

**Infected**

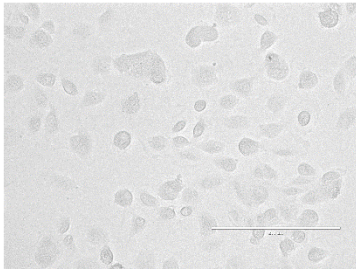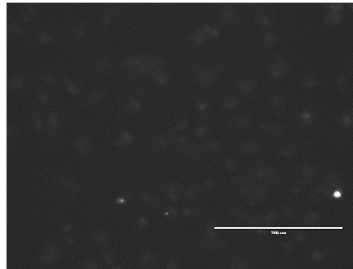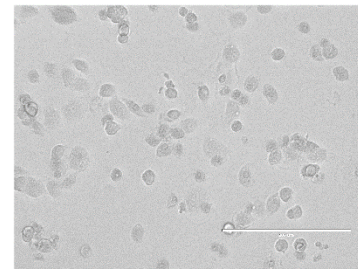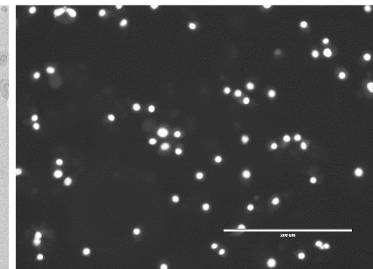

**Infected  
+PEG 8000**

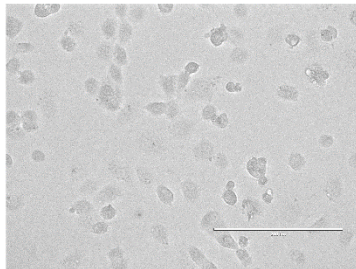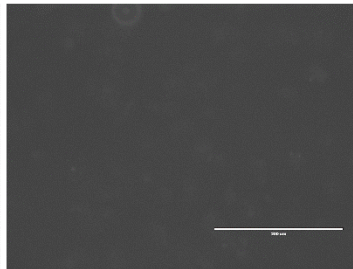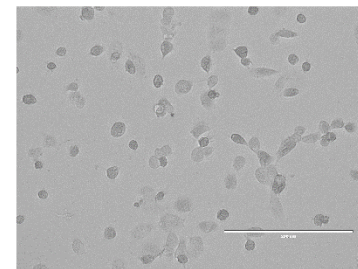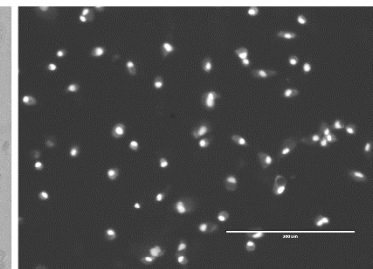

**Untreated Cells**

**Interferon-treated Cells**

**Figure S3, Results of ethidium bromide staining in experiment 72.** PEG 8000 did not prevent the IFN- $\gamma$ -pretreated, *R. prowazekii*-infected endothelial cells from being stained with ethidium bromide, even though it suppressed the release LDH. This figure has two panels (A and B), which represent duplicate cultures in this experiment. PEG 8000 was added at the start of the mock-infection or along with the rickettsiae, and it was continuously present thereafter. Ethidium bromide staining was done at 3 to 6 hours after the start of the mock infection or addition of the rickettsiae. Each bar represents 200  $\mu$ m. Each image was adjusted using Adobe Photoshop® software. In each case, the adjustments were applied to the entire image. However, different adjustments may have been applied to different images to optimize the appearance of the images.
