# Supplementary material for: Involvement of Pore Formation and Osmotic Lysis in the Rapid Killing of Gamma Interferon-Pretreated C166 Endothelial Cells by Rickettsia prowazekii
Source: MDPI journal article supplement (doi:10.3390/tropicalmed7080163), 2022-08-01

**Figure S2, Results of ethidium bromide staining in exp 79 (mock-infected)**

## Exp 79 - Mock-infected

Transmitted Light (A)

### Fluorescence (B)

Fluorescence\* (C)

### Overlay (D)

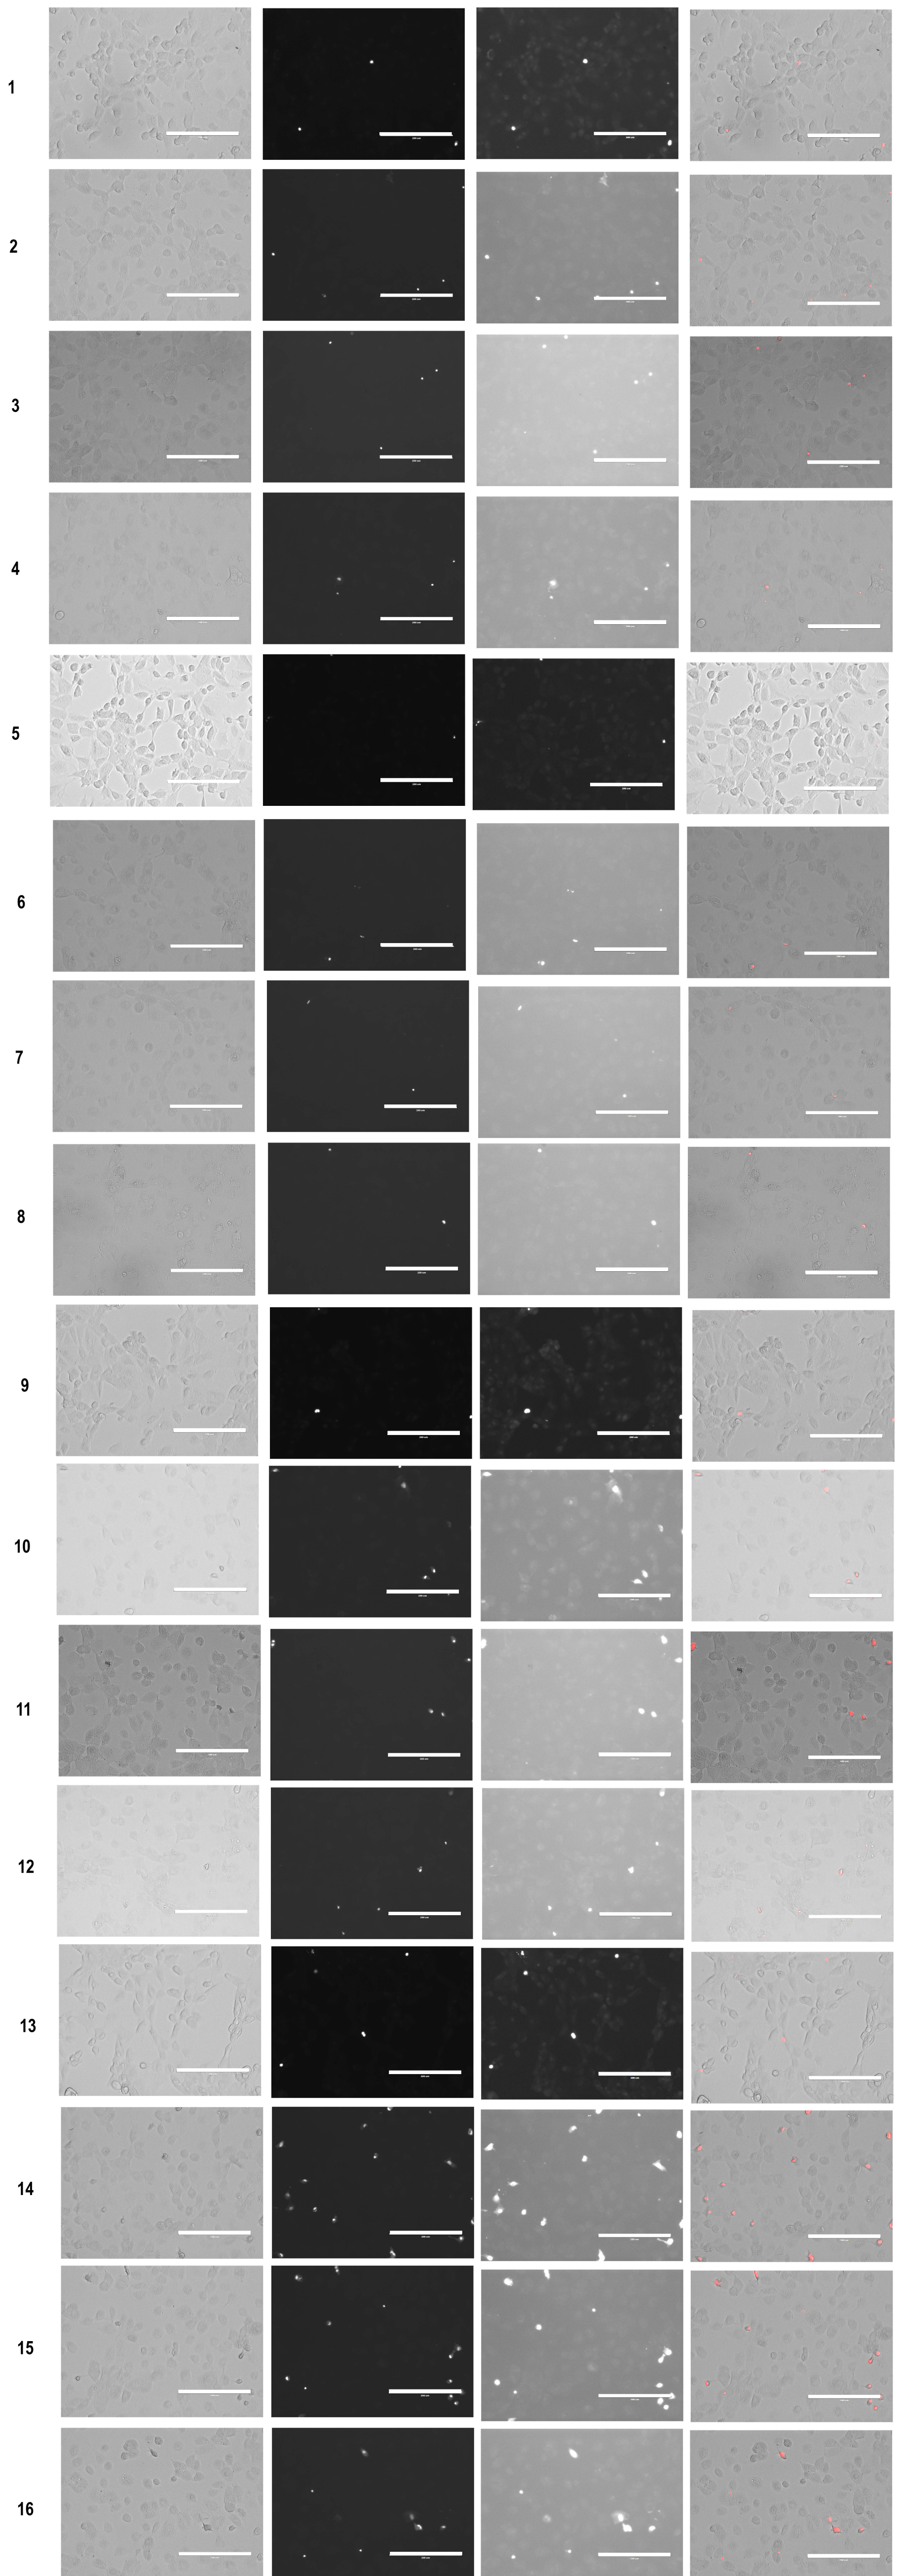

Supplement: s1 [file s1]
