# Supplementary material for: Involvement of Pore Formation and Osmotic Lysis in the Rapid Killing of Gamma Interferon-Pretreated C166 Endothelial Cells by Rickettsia prowazekii
Source: MDPI journal article supplement (doi:10.3390/tropicalmed7080163), 2022-08-01
Supplement: s1 [file s1]

| Table S7                                                    |                                               | Abbreviations for treatments are shown in red.<br>Definitions are given in black, bold type<br>below the treatment abbreviations. |         |         |   |
|-------------------------------------------------------------|-----------------------------------------------|-----------------------------------------------------------------------------------------------------------------------------------|---------|---------|---|
| LDH release after removal of PEG                            |                                               | "d/a" indicates that Peg was added at the time of<br>infection or mock-infection                                                  |         |         |   |
| Expts 74 & 75<br>Exp 75                                     |                                               |                                                                                                                                   |         |         |   |
| Treatment for 3-4 h<br>after mock-infection or<br>infection | Treatment post wash<br>for 3-3.5 additional h | % total<br>LDH<br>released                                                                                                        | Average | Std Dev | n |
| C+M                                                         | FMS                                           | 0.00                                                                                                                              | 0.2     | 0.2     | 3 |
| Untreated                                                   | Phenol red free                               | 0.20                                                                                                                              |         |         |   |
| mock-infected                                               | medium+5% serum                               | 0.40                                                                                                                              |         |         |   |
| C+M+P8kDA                                                   | FMS                                           | 0.00                                                                                                                              | 0.3     | 0.4     | 4 |
| Untreated                                                   | Phenol red free                               | 0.10                                                                                                                              |         |         |   |
| mock-infected                                               | medium+5% serum                               | 0.80                                                                                                                              |         |         |   |
| +Peg 8000 d/a                                               |                                               | 0.40                                                                                                                              |         |         |   |
| C+M+P8kDA                                                   | P8k                                           | 1.50                                                                                                                              | 1.5     | 0.0     | 2 |
| Untreated                                                   | Peg 8000                                      | 1.50                                                                                                                              |         |         |   |
| mock-infected                                               |                                               |                                                                                                                                   |         |         |   |
| +Peg 8000 d/a                                               |                                               |                                                                                                                                   |         |         |   |
| I+M                                                         | FMS                                           | 0.00                                                                                                                              | 0.4     | 0.3     | 4 |
| IFN-treated                                                 | Phenol red free                               | 0.70                                                                                                                              |         |         |   |
| mock-infected                                               | medium+5% serum                               | 0.20                                                                                                                              |         |         |   |
|                                                             |                                               | 0.60                                                                                                                              |         |         |   |
| I+M+P8kDA                                                   | FMS                                           | 0.00                                                                                                                              | 1.8     | 1.7     | 3 |
| IFN-treated                                                 | Phenol red free                               | 2.30                                                                                                                              |         |         |   |
| mock-infected                                               | medium+5% serum                               | 3.20                                                                                                                              |         |         |   |
| +Peg 8000 d/a                                               |                                               |                                                                                                                                   |         |         |   |
| I+M+P8kDA                                                   | P8k                                           | 1.80                                                                                                                              | 1.9     | 0.1     | 2 |
| IFN-treated                                                 | Peg 8000                                      | 1.90                                                                                                                              |         |         |   |
| mock-infected                                               |                                               |                                                                                                                                   |         |         |   |
| +Peg 8000 d/a                                               |                                               |                                                                                                                                   |         |         |   |
| C+Rp                                                        | FMS                                           | 0.20                                                                                                                              | 0.3     | 0.2     | 4 |
| Untreated                                                   | Phenol red free                               | 0.10                                                                                                                              |         |         |   |
| Infected                                                    | medium+5% serum                               | 0.30                                                                                                                              |         |         |   |
|                                                             |                                               | 0.50                                                                                                                              |         |         |   |
| C+Rp+P8kDA                                                  | FMS                                           | 0.30                                                                                                                              | 0.6     | 0.3     | 6 |
| Untreated                                                   | Phenol red free                               | 0.40                                                                                                                              |         |         |   |
| Infected                                                    | medium+5% serum                               | 0.50                                                                                                                              |         |         |   |
| +Peg 8000 d/a                                               |                                               | 1.00                                                                                                                              |         |         |   |
|                                                             |                                               | 0.50                                                                                                                              |         |         |   |
|                                                             |                                               | 0.80                                                                                                                              |         |         |   |
| C+Rp+P8kDA                                                  | P8k                                           | 1.80                                                                                                                              | 1.7     | 0.2     | 2 |
| Untreated                                                   | Peg 8000                                      | 1.50                                                                                                                              |         |         |   |
| Infected                                                    |                                               |                                                                                                                                   |         |         |   |
| +Peg 8000 d/a                                               |                                               |                                                                                                                                   |         |         |   |
| I+Rp                                                        | FMS                                           | 7.6                                                                                                                               | 8.5     | 0.9     | 4 |
| IFN-treated                                                 | Phenol red free                               | 7.9                                                                                                                               |         |         |   |
| Infected                                                    | medium+5% serum                               | 9.1                                                                                                                               |         |         |   |
|                                                             |                                               | 9.4                                                                                                                               |         |         |   |
| I+Rp+P8kDA                                                  | FMS                                           | 19.7                                                                                                                              | 21.8    | 1.5     | 6 |
| IFN-treated                                                 | Phenol red free                               | 21.9                                                                                                                              |         |         |   |
| Infected                                                    | medium+5% serum                               | 20.2                                                                                                                              |         |         |   |
| +Peg 8000 d/a                                               |                                               | 22.7                                                                                                                              |         |         |   |
|                                                             |                                               | 23.1                                                                                                                              |         |         |   |
|                                                             |                                               | 23.1                                                                                                                              |         |         |   |
| I+Rp+P8kDA                                                  | P8k                                           | 2.4                                                                                                                               | 2.5     | 0.1     | 2 |
| IFN-treated                                                 | Peg 8000                                      | 2.5                                                                                                                               |         |         |   |
| Infected                                                    |                                               |                                                                                                                                   |         |         |   |
| +Peg 8000 d/a                                               |                                               |                                                                                                                                   |         |         |   |
