# Supplementary material for: Involvement of Pore Formation and Osmotic Lysis in the Rapid Killing of Gamma Interferon-Pretreated C166 Endothelial Cells by Rickettsia prowazekii
Source: MDPI journal article supplement (doi:10.3390/tropicalmed7080163), 2022-08-01
Supplement: s1 [file s1]

**Table S6**  
**Percentage of Total LDH Released with Lower PEG Concentrations**

Abbreviations are defined on page 2

|         |                     | Hours after addition of rickettsiae |       |       |       |
|---------|---------------------|-------------------------------------|-------|-------|-------|
|         |                     | 1                                   | 2     | 3     | 4     |
| RpM IFN | Peg 4000-30 mM d/a  | 0.04                                | 18.57 | 29.4  | 32.04 |
|         |                     | 0                                   | 18.89 | 29.89 | 34.25 |
|         |                     | 1                                   | 15.7  | 34.2  | 40.6  |
|         |                     | 0.4                                 | 14.7  | 32.7  | 43.1  |
|         |                     | 3.1                                 | 20.7  | 30.3  | 33.4  |
|         |                     | 1.5                                 | 20.1  | 28.9  | 32.2  |
|         |                     |                                     |       |       |       |
| Mean    |                     | 1.0                                 | 18.1  | 30.9  | 35.9  |
| Std Dev |                     | 1.2                                 | 2.4   | 2.1   | 4.7   |
|         |                     |                                     |       |       |       |
| RpM IFN | Peg 4000-15 mM d/a  | 1.4                                 | 32.9  | 54.8  | 62.8  |
|         |                     | 2.1                                 | 32.7  | 50.2  | 57.8  |
|         |                     |                                     |       |       |       |
| Mean    |                     | 1.8                                 | 32.8  | 52.5  | 60.3  |
| Std Dev |                     | 0.5                                 | 0.1   | 3.3   | 3.5   |
|         |                     |                                     |       |       |       |
| RpM IFN | Peg 4000-7.5 mM d/a | 2.4                                 | 45    | 63.6  | 75.2  |
|         |                     | 3.6                                 | 36.7  | 54.1  | 62.6  |
|         |                     |                                     |       |       |       |
| Mean    |                     | 3.0                                 | 40.9  | 58.9  | 68.9  |
| Std Dev |                     | 0.8                                 | 5.9   | 6.7   | 8.9   |
|         |                     |                                     |       |       |       |
| RpM IFN | No PEG              | 3.76                                | 41.75 | 52.12 | 55.62 |
|         |                     | 2.81                                | 43.3  | 54.58 | 58.46 |
|         |                     | 5                                   | 43.3  | 57.1  | 65.4  |
|         |                     | 3.9                                 | 47.5  | 63    | 74.3  |
|         |                     | 8.9                                 | 38.6  | 47.5  | 49.1  |
|         |                     | 9.5                                 | 36.9  | 43.8  | 46.1  |
|         |                     | 2.26                                |       | 60.3  | 66.1  |
|         |                     | 3.02                                |       | 58    | 61.4  |
|         |                     | 1.3                                 |       | 61.5  | 67.5  |
|         |                     | 1.2                                 |       | 58.6  | 62.1  |
|         |                     | 1.3                                 |       | 57.2  | 50    |
|         |                     |                                     |       | 59.9  | 49.4  |
|         |                     |                                     |       | 50.8  | 50    |
|         |                     |                                     |       | 53.1  |       |
|         |                     |                                     |       | 53.2  |       |
|         |                     |                                     |       | 52.4  |       |
| Mean    |                     | 3.91                                | 41.89 | 55.19 | 58.11 |
| Std Dev |                     | 2.88                                | 3.77  | 5.23  | 8.82  |

Hours after addition of rickettsiae

|         |                    | 1   | 2   | 3   | 4   |
|---------|--------------------|-----|-----|-----|-----|
| RpM IFN | Peg 8000-15 mM d/a | 2.8 | 4.1 | 3.3 | 4.8 |
|         |                    | 2.2 | 3.6 | 3.2 | 3.9 |
|         |                    | 2   | 2.5 | 3   | 3.5 |
|         |                    | 2   | 2.5 | 3.3 | 4.3 |
|         |                    |     |     | 3.9 | 4.7 |
|         |                    |     |     | 5.1 | 5.7 |
|         |                    |     |     | 5.5 | 5.1 |
|         |                    |     |     | 3.9 | 5.2 |
|         |                    |     |     | 4.6 | 8.5 |
|         |                    |     |     | 4.7 | 7.3 |
|         |                    |     |     | 5.2 | 5.7 |
|         |                    |     |     | 5   | 7.3 |
|         |                    |     |     | 5.1 | 3.4 |
|         |                    |     |     | 5.8 | 2.9 |
|         |                    |     |     | 6.5 | 3   |
|         |                    |     |     | 4.9 |     |

|         |     |     |     |     |
|---------|-----|-----|-----|-----|
| Mean    | 2.3 | 3.2 | 4.6 | 5.0 |
| Std Dev | 0.4 | 0.8 | 1.0 | 1.7 |

|         |                     |     |      |      |      |
|---------|---------------------|-----|------|------|------|
| RpM IFN | Peg 8000-7.5 mM d/a | 1.4 | 28.4 | 44.2 | 58.8 |
|         |                     | 1.6 | 21.7 | 37.6 | 49   |

|         |     |      |      |      |
|---------|-----|------|------|------|
| Mean    | 1.5 | 25.1 | 40.9 | 53.9 |
| Std Dev | 0.1 | 4.7  | 4.7  | 6.9  |

DEFINITION OF ABBREVIATIONS IN THIS TABLE

"d/a" indicates that PEGs were added along with the rickettsiae.

RpM IFN=IFN-treated, RpMedium infected

See Figure 3 and the results section for additional information about RpL, RpM, and RpH. These indicate the use of different concentrations of rickettsiae.
