# Supplementary material for: Involvement of Pore Formation and Osmotic Lysis in the Rapid Killing of Gamma Interferon-Pretreated C166 Endothelial Cells by Rickettsia prowazekii
Source: MDPI journal article supplement (doi:10.3390/tropicalmed7080163), 2022-08-01
Supplement: s1 [file s1]

**Table S5**  
**Rickettsial Infection Data for Figure 3**

| Untreated cells |      |      |        |      | IFN-treated cells |      |      |        |      |
|-----------------|------|------|--------|------|-------------------|------|------|--------|------|
|                 | %R   | RI   | NR*100 | NR   |                   | %R   | RI   | NR*100 | NR   |
| <b>RpLow</b>    | 63   | 3.1  | 195    | 2.0  |                   | 73   | 5.4  | 393    | 3.9  |
|                 | 55   | 3.6  | 200    | 2.0  |                   | 81   | 5.1  | 410    | 4.1  |
|                 | 74   | 4.5  | 332    | 3.3  |                   | 80   | 7.5  | 596    | 6.0  |
| <b>Avg</b>      | 64.0 | 3.7  | 242.3  | 2.4  |                   | 78.0 | 6.0  | 466.3  | 4.7  |
| <b>Std Dev</b>  | 9.5  | 0.7  | 77.7   | 0.8  |                   | 4.4  | 1.3  | 112.6  | 1.1  |
| <b>RpMedium</b> | 82   | 5.9  | 482    | 4.8  |                   | 91   | 8.0  | 729    | 7.3  |
|                 | 91   | 7.1  | 646    | 6.5  |                   | 92   | 7.4  | 684    | 6.8  |
|                 | 80   | 7.6  | 609    | 6.1  |                   | 97   | 12.1 | 1172   | 11.7 |
| <b>Avg</b>      | 84.3 | 6.9  | 579.0  | 5.8  |                   | 93.3 | 9.2  | 861.7  | 8.6  |
| <b>Std Dev</b>  | 5.9  | 0.9  | 86.0   | 0.9  |                   | 3.2  | 2.5  | 269.7  | 2.7  |
| <b>RpHigh</b>   | 98   | 13.5 | 1323   | 13.2 |                   | 95   | 13.3 | 1265   | 12.7 |
|                 | 88   | 10.0 | 880    | 8.8  |                   | 97   | 16.0 | 1548   | 15.5 |
|                 | 97   | 17.5 | 1694   | 16.9 |                   | 96   | 16.0 | 1532   | 15.3 |
| <b>Avg</b>      | 94.3 | 13.7 | 1299.0 | 13.0 |                   | 96.0 | 15.1 | 1448.3 | 14.5 |
| <b>Std Dev</b>  | 5.5  | 3.7  | 407.5  | 4.1  |                   | 1.0  | 1.5  | 159.0  | 1.6  |

%R= percent infected

RI=rickettsiae per infected cell

NR\*100=rickettsiae in 100 cells

NR=rickettsiae per cell
