# Supplementary figures and images for: Involvement of Pore Formation and Osmotic Lysis in the Rapid Killing of Gamma Interferon-Pretreated C166 Endothelial Cells by Rickettsia prowazekii
Source: MDPI journal article supplement (doi:10.3390/tropicalmed7080163), 2022-08-01

Figure S1, Results of ethidium bromide staining in exp 77 (infected)

Exp 77 - Infected

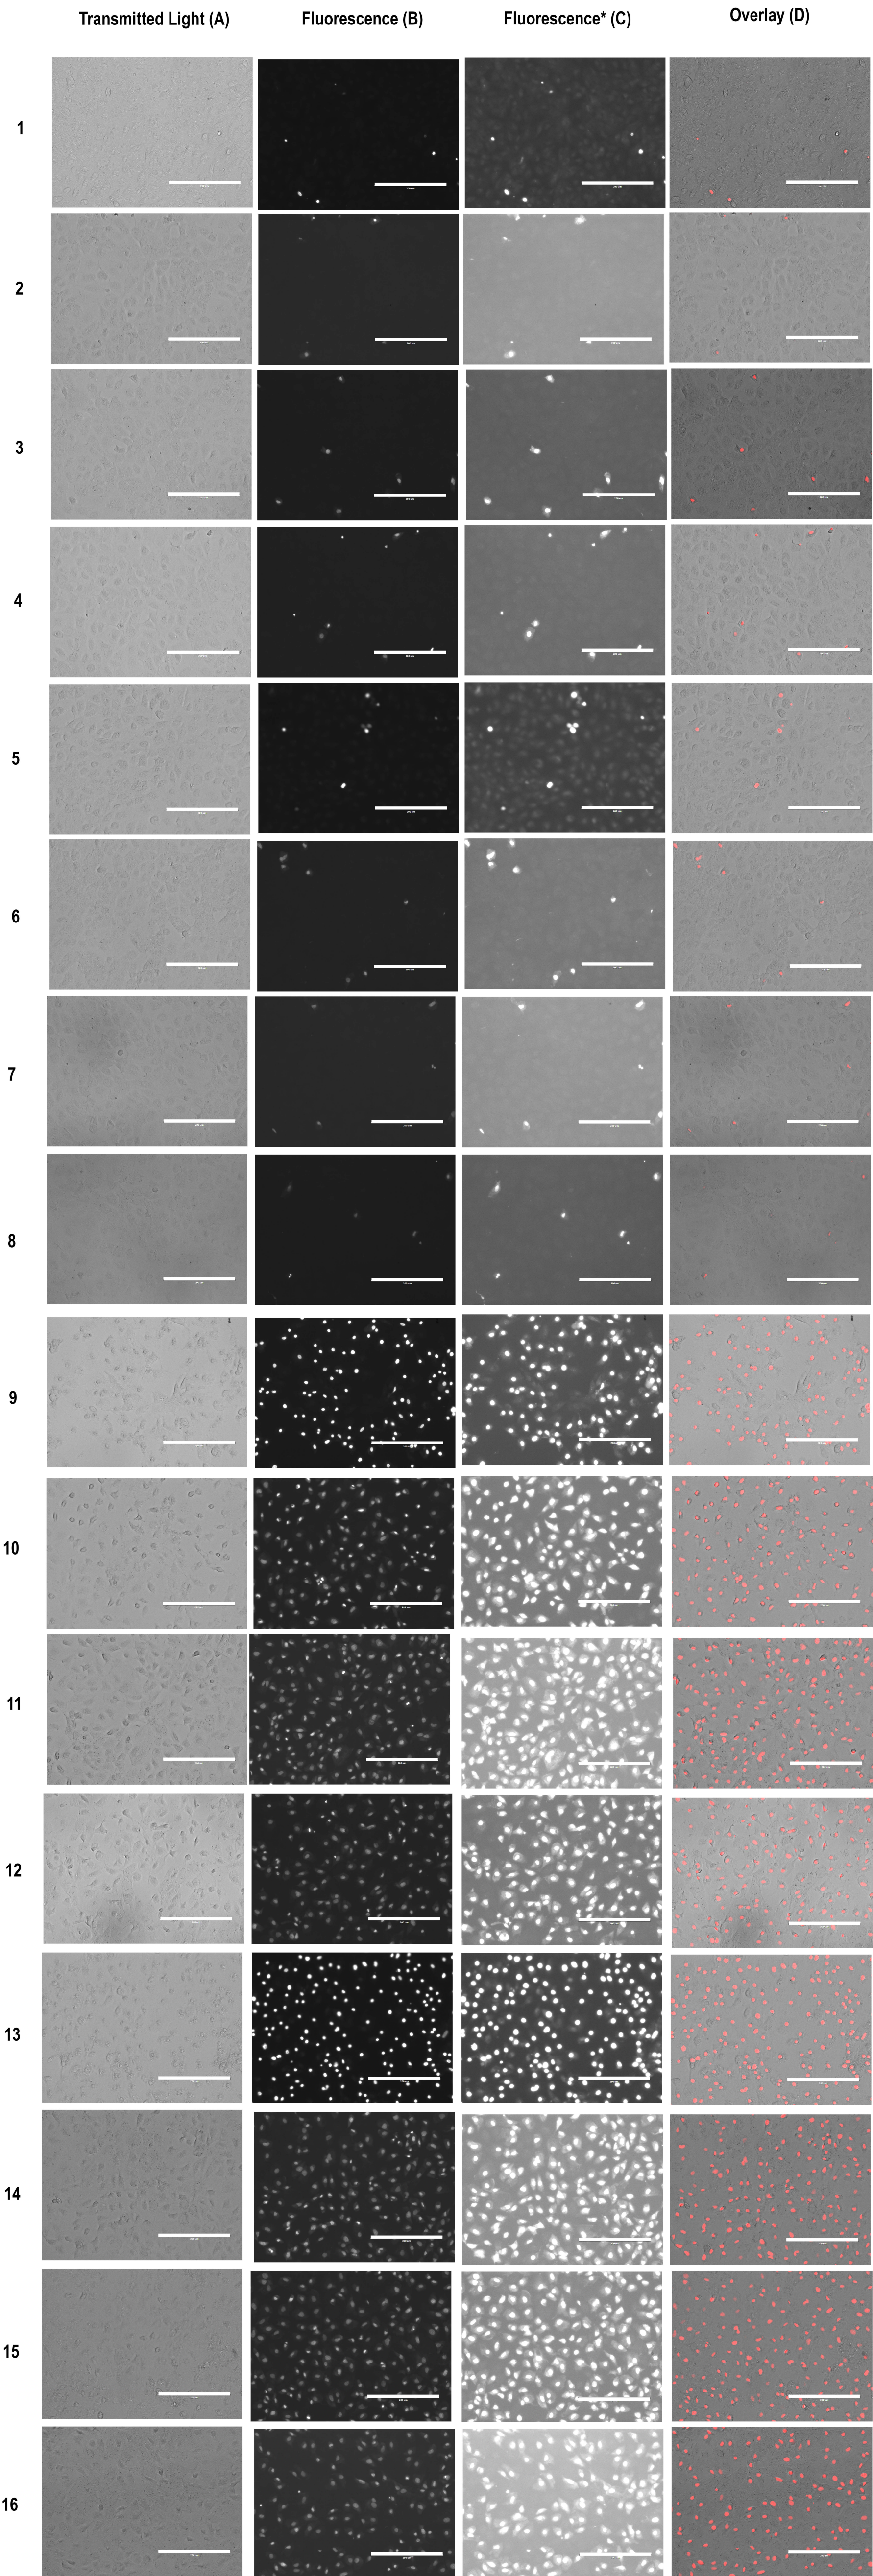

Supplement: s1 [file s1]
